# Supplementary material for: Ni-Catalyzed radical cyclization of vinyl azides with cyclobutanone oxime esters to access cyanoalkyl containing quinoxalin-2(1H)-ones
Source: Royal Society of Chemistry journal article supplement (doi:10.1039/d1ob00610j), 2021-01-01

# Supporting Information

## Ni-catalyzed Radical Cyclization of Vinyl Azides with Cyclobutanone Oxime Esters to Access Cyanoalkyl Containing Quinoxalin-2(1H)-ones

Nengneng Zhou,\* Sixin Wu, Kaimo Kuang, Meixia Wu, and Man Zhang

*Key Laboratory of Functionalized Molecular Solids, Ministry of Education, Anhui Key Laboratory of Molecule-Based Materials, College of Chemistry and Materials Science, Anhui Normal University, Wuhu, Anhui 241000, China.*

E-mail: [zhounn@ahnu.edu.cn](mailto:zhounn@ahnu.edu.cn)

### Table of Contents

|                                                                             |    |
|-----------------------------------------------------------------------------|----|
| General information.....                                                    | 2  |
| General procedure for the synthesis of <b>3</b> .....                       | 2  |
| Trapping experiment with TEMPO.....                                         | 2  |
| Optimization of reaction conditions.....                                    | 3  |
| Reference.....                                                              | 4  |
| Characterization data of products <b>3</b> .....                            | 4  |
| Copies of <sup>1</sup> H NMR, <sup>13</sup> C NMR, <sup>19</sup> F NMR..... | 10 |

### General Information:

All reactions were carried out under Ar atmosphere unless otherwise noted. All catalysts and solvents were obtained from commercial suppliers. Reactions were monitored by TLC on silica gel plates (GF254), and the analytical thin-layer chromatography (TLC) was performed on precoated, glass-backed silica gel plates.  $^1\text{H}$  NMR,  $^{13}\text{C}$  NMR and  $^{19}\text{F}$  NMR spectra were recorded on 400 MHz spectrometer at room temperature. Chemical shifts ( $\delta$ ) are reported in ppm downfield from tetramethylsilane. High resolution mass spectra were obtained on a high-resolution mass spectrometer in the ESI mode. All of vinyl azides **1** were synthesized according to the literature.<sup>1</sup> And all of cycloketone oxime esters **2** were synthesized from the corresponding cycloketones and carboxylic acids according to the literature.<sup>2a</sup> The substituted cycloketones were prepared according to the reported procedure.<sup>2b</sup>

### General procedure for the synthesis of **3**

An oven-dried Schlenk tube (10 mL) was equipped with a magnetic stir bar, **1** (0.1 mmol), cycloketone *O*-acyl oximes **2** (2 equiv, 0.2 mmol),  $\text{NiCl}_2\cdot\text{glyme}$  (5 mol%). The flask was evacuated and backfilled with Ar for 3 times. 1 mL DMF was added with syringe under Ar. The tube was then sealed and the mixture was stirred at 70 °C for 24 h. After the reaction was finished, 10 ml water was added and the resulting mixture was extracted with EtOAc ( $3 \times 10$  mL). The combined organic phase was washed with brine (10 mL), dried over  $\text{Na}_2\text{SO}_4$ , and concentrated under reduced pressure. The residue was purified by column chromatography on silica gel (petroleum ether/ethyl acetate, 3:1, v/v) to obtain the desired product **3**.

### Trapping experiment with TEMPO

An oven-dried Schlenk tube (10 mL) was equipped with a magnetic stir bar, **1** (0.1 mmol), cyclobutanone *O*-acyl oximes **2** (2 equiv, 0.2 mmol),  $\text{NiCl}_2\cdot\text{glyme}$  (5 mol%). The flask was evacuated and backfilled with Ar for 3 times. 1 mL DMF was added with syringe under Ar. The tube was then sealed and the mixture was stirred at 70 °C for 24 h. However, product **3aa** could not be detected, the intermediate **4** was formed, suggesting that this transformation proceeds through a radical pathway.

### The HRMS (ESI) for the intermediate **4**

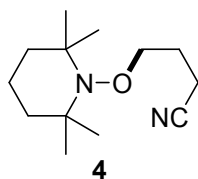

HRMS [ $4+\text{H}$ ]<sup>+</sup>: Calcd: 225.1691; Found: 225.1694.

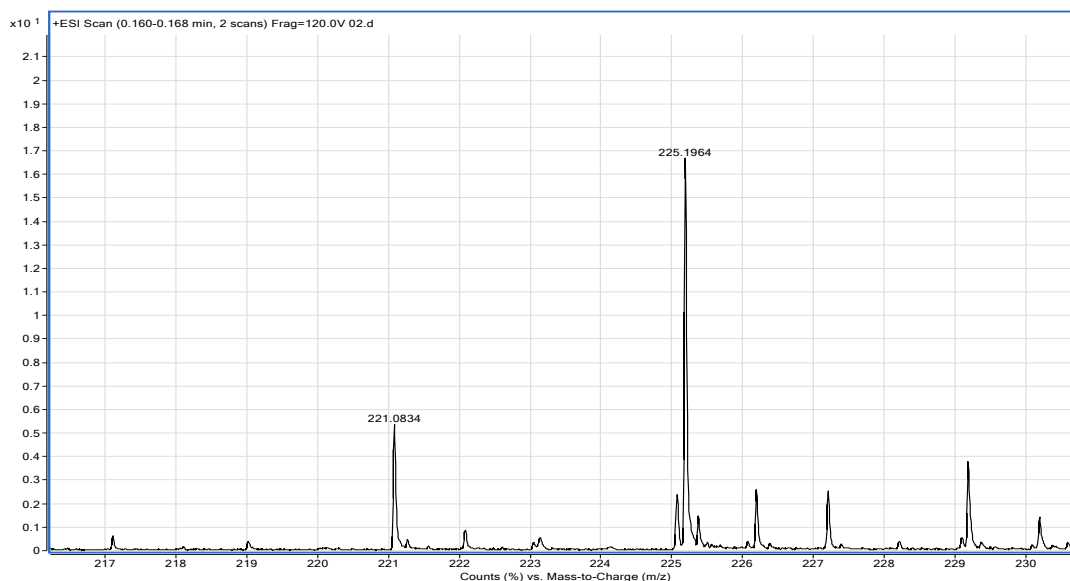

Table 1. Optimization of Reaction Conditions<sup>a</sup>

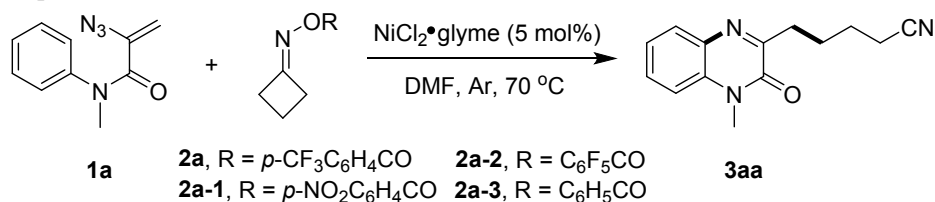

| Entry           | Variation from the standard conditions                                       | Yield(%) <sup>b</sup> |
|-----------------|------------------------------------------------------------------------------|-----------------------|
| 1               | none                                                                         | 75                    |
| 2               | <b>2a-1</b> instead of <b>2a</b>                                             | 61                    |
| 3               | <b>2a-2</b> instead of <b>2a</b>                                             | 56                    |
| 4               | <b>2a-3</b> instead of <b>2a</b>                                             | 24                    |
| 5               | without NiCl <sub>2</sub> ·glyme                                             | 0                     |
| 6               | 5 mol % FeCl <sub>2</sub> as the catalyst                                    | 23                    |
| 7               | 5 mol % Fe(OAc) <sub>2</sub> as the catalyst                                 | 38                    |
| 8               | 5 mol % CuCl <sub>2</sub> as the catalyst                                    | 17                    |
| 9               | 5 mol % CuCl as the catalyst                                                 | 6                     |
| 10              | 5 mol % CuBr <sub>2</sub> as the catalyst                                    | 16                    |
| 11              | 5 mol % CuO as the catalyst                                                  | 23                    |
| 12              | 5 mol % Cu(OAc) <sub>2</sub> as the catalyst                                 | 15                    |
| 13              | 5 mol % NiCl <sub>2</sub> as the catalyst                                    | 35                    |
| 14              | 5 mol % NiBr <sub>2</sub> as the catalyst                                    | 31                    |
| 15              | 5 mol % Ni(OAc) <sub>2</sub> as the catalyst                                 | 58                    |
| 16              | 5 mol % Ni(acac) <sub>2</sub> as the catalyst                                | 43                    |
| 17 <sup>c</sup> | 2 mol % <i>fac</i> -Ir(ppy) <sub>3</sub> as the catalyst                     | 48                    |
| 18 <sup>c</sup> | 2 mol % Ru(bpy) <sub>3</sub> (PF <sub>6</sub> ) <sub>2</sub> as the catalyst | 32                    |
| 19 <sup>c</sup> | 2 mol % 4CzIPN as the catalyst                                               | 38                    |
| 20 <sup>c</sup> | 2 mol % Eosin Y as the catalyst                                              | 0                     |
| 21              | 10 mol % NiCl <sub>2</sub> ·glyme was used                                   | 73                    |
| 22              | 1,4-dioxane as the solvent                                                   | 26                    |

|    |                                   |    |
|----|-----------------------------------|----|
| 23 | CH <sub>3</sub> CN as the solvent | 70 |
| 24 | toluene as the solvent            | 41 |
| 25 | DMSO as the solvent               | 51 |
| 26 | DMA as the solvent                | 45 |
| 27 | 1.5 equiv <b>2a</b>               | 67 |
| 28 | at 60 °C                          | 61 |
| 29 | at 80 °C                          | 53 |

Reaction conditions: **1a** (0.1 mmol, 0.1 M), **2a** (0.2 mmol, 2 equiv), 5 mol % NiCl<sub>2</sub>•glyme, and DMF (1 mL) at 70 °C (oil bath) in an argon atmosphere for 24 h. <sup>b</sup> Yield of isolated product. <sup>c</sup> Under 12 W blue LED irradiation for 24 h.

## Reference

- (a) T. Yang, H. Zhu, W. Yu, *Org. Biomol. Chem.*, 2016, **14**, 3376; (b) E. G. Mackay, A. Studer, *Chem. Eur. J.* 2016, **22**, 13455.
- (a) T. Nishimura, Y. Nishiguchi, Y. Maeda, S. Uemura, *J. Org. Chem.* 2004, **69**, 5342. (b) Y.-R. Gu, X.-H. Duan, L. Yang, L.-N. Guo, *Org. Lett.* 2017, **19**, 5908.
- B. Zhao, H. Tan, C. Chen, N. Jiao, N. and Z. Shi, *Chin. J. Chem.* 2018, **36**, 995.

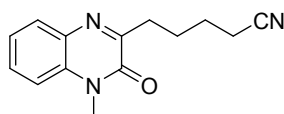

5-(4-methyl-3-oxo-3,4-dihydroquinoxalin-2-yl)pentanenitrile (**3aa**). Yellow solid; (18 mg, 75%); mp: 103-107 °C;  $R_f$  = 0.20 (petroleum ether/ethyl acetate 3:1); <sup>1</sup>H NMR (400 MHz, CDCl<sub>3</sub>): δ = 7.85-7.82 (m, 1H), 7.57-7.53 (m, 1H), 7.38-7.30 (m, 2H), 3.71 (s, 3H), 2.99 (t,  $J$  = 7.2 Hz, 2H), 2.44 (t,  $J$  = 7.2 Hz, 2H), 2.03-1.95 (m, 2H), 1.86-1.79 (m, 2H) ppm; <sup>13</sup>C NMR (101 MHz, CDCl<sub>3</sub>): δ 159.6, 154.8, 133.0, 132.6, 129.8, 129.7, 123.6, 119.6, 113.6, 32.8, 29.0, 25.4, 25.1, 17.0 ppm. ESI-HRMS:  $m/z$  Calcd for C<sub>14</sub>H<sub>15</sub>N<sub>3</sub>O [M+H<sup>+</sup>]: 241.1215, found 241.1217.

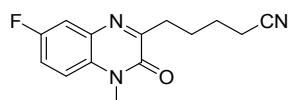

5-(7-fluoro-4-methyl-3-oxo-3,4-dihydroquinoxalin-2-yl)pentanenitrile (**3ba**). Yellow solid; (14.8 mg, 57%); mp: 115-117 °C;  $R_f$  = 0.20 (petroleum ether/ethyl acetate 3:1); <sup>1</sup>H NMR (400 MHz, CDCl<sub>3</sub>): δ = 7.55-7.52 (m, 1H), 7.32-7.25 (m, 1H), 3.70 (s, 3H), 2.99 (t,  $J$  = 7.2 Hz, 2H), 2.44 (t,  $J$  = 7.2 Hz, 2H), 2.02-1.94 (m, 2H), 1.86-1.78 (m, 2H) ppm; <sup>13</sup>C NMR (101 MHz, CDCl<sub>3</sub>): δ 161.3, 158.7 (d,  $J$  = 305 Hz), 154.4, 133.1 (d,  $J$  = 14 Hz), 129.7 (d,  $J$  = 3 Hz), 119.6, 117.5 (d,  $J$  = 30 Hz), 115.2 (d,  $J$  = 28 Hz), 114.7 (d,  $J$  = 11 Hz), 32.9, 29.3, 25.2, 25.0, 17.0 ppm; <sup>19</sup>F NMR (376 MHz, CDCl<sub>3</sub>): δ -118.9 ppm. ESI-HRMS:  $m/z$  Calcd for C<sub>14</sub>H<sub>14</sub>FN<sub>3</sub>O [M+H<sup>+</sup>]: 259.1121, found 259.1123.

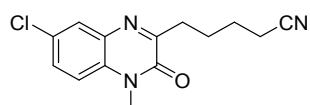

5-(7-chloro-4-methyl-3-oxo-3,4-dihydroquinoxalin-2-yl)pentanenitrile (**3ca**). Yellow solid; (19.6 mg, 72%); mp: 121-124 °C;  $R_f$  = 0.20 (petroleum ether/ethyl acetate 3:1); <sup>1</sup>H NMR (400 MHz,

CDCl<sub>3</sub>):  $\delta$  = 7.82 (s, 1H), 7.51-7.48 (m, 1H), 7.25-7.23 (m, 1H), 3.69 (s, 3H), 2.98 (t,  $J$  = 7.2 Hz, 2H), 2.44 (t,  $J$  = 7.2 Hz, 2H), 2.01-1.94 (m, 2H), 1.85-1.78 (m, 2H) ppm; <sup>13</sup>C NMR (101 MHz, CDCl<sub>3</sub>):  $\delta$  161.1, 154.4, 133.1, 131.7, 129.7, 129.0, 128.9, 119.5, 114.7, 32.8, 29.2, 25.1, 25.0, 17.0 ppm. ESI-HRMS:  $m/z$  Calcd for C<sub>14</sub>H<sub>15</sub>ClN<sub>3</sub>O [M+H<sup>+</sup>]: 276.0898, found 276.0895.

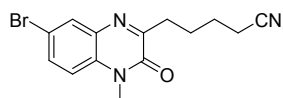

5-(7-bromo-4-methyl-3-oxo-3,4-dihydroquinoxalin-2-yl)pentanenitrile (**3da**). Yellow solid; (20.2 mg, 63%); mp: 131-134 °C;  $R_f$  = 0.20 (petroleum ether/ethyl acetate 3:1); <sup>1</sup>H NMR (400 MHz, CDCl<sub>3</sub>):  $\delta$  = 7.982-7.978 (m, 1H), 7.64-7.61 (m, 1H), 7.19-7.13 (m, 1H), 3.68 (s, 3H), 2.98 (t,  $J$  = 7.2 Hz, 2H), 2.44 (t,  $J$  = 7.2 Hz, 2H), 2.01-1.94 (m, 2H), 1.85-1.78 (m, 2H) ppm; <sup>13</sup>C NMR (101 MHz, CDCl<sub>3</sub>):  $\delta$  161.1, 154.4, 133.4, 132.5, 132.2, 132.1, 119.5, 116.2, 115.0, 32.8, 29.2, 25.1, 25.0, 17.0 ppm. ESI-HRMS:  $m/z$  Calcd for C<sub>14</sub>H<sub>15</sub>BrN<sub>3</sub>O [M+H<sup>+</sup>]: 320.0393, found 320.0396.

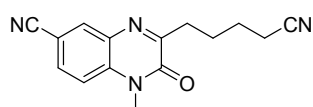

3-(4-cyanobutyl)-1-methyl-2-oxo-1,2-dihydroquinoxaline-6-carbonitrile (**3ea**). Yellow solid; (20.3 mg, 76%); mp: 124-127 °C;  $R_f$  = 0.20 (petroleum ether/ethyl acetate 3:1); <sup>1</sup>H NMR (400 MHz, CDCl<sub>3</sub>):  $\delta$  = 8.15-8.14 (m, 1H), 7.79-7.76 (m, 1H), 7.40-7.38 (m, 1H), 3.72 (s, 3H), 3.00 (t,  $J$  = 7.2 Hz, 2H), 2.45 (t,  $J$  = 7.2 Hz, 2H), 2.03-1.95 (m, 2H), 1.86-1.78 (m, 2H) ppm; <sup>13</sup>C NMR (101 MHz, CDCl<sub>3</sub>):  $\delta$  162.0, 154.4, 136.3, 134.0, 132.4, 132.1, 119.4, 117.9, 114.7, 107.1, 32.8, 29.3, 25.0, 24.9, 17.0 ppm. ESI-HRMS:  $m/z$  Calcd for C<sub>15</sub>H<sub>15</sub>N<sub>4</sub>O [M+H<sup>+</sup>]: 267.1240, found 267.1237.

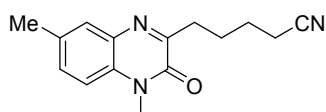

5-(4,7-dimethyl-3-oxo-3,4-dihydroquinoxalin-2-yl)pentanenitrile (**3fa**). Yellow solid; (13.6 mg, 53%); mp: 108-110 °C;  $R_f$  = 0.20 (petroleum ether/ethyl acetate 3:1); <sup>1</sup>H NMR (400 MHz, CDCl<sub>3</sub>):  $\delta$  = 7.66-7.65 (m, 1H), 7.39-7.36 (m, 1H), 7.23-7.21 (m, 1H), 3.71 (s, 3H), 3.00 (t,  $J$  = 7.2 Hz, 2H), 2.48 (s, 3H), 2.45 (t,  $J$  = 7.2 Hz, 2H), 2.03-1.96 (m, 2H), 1.88-1.80 (m, 2H) ppm; <sup>13</sup>C NMR (101 MHz, CDCl<sub>3</sub>):  $\delta$  159.6, 154.8, 133.5, 132.5, 131.0, 130.9, 129.6, 119.6, 113.4, 32.9, 29.0, 25.4, 25.1, 20.6, 17.0 ppm. ESI-HRMS:  $m/z$  Calcd for C<sub>15</sub>H<sub>18</sub>N<sub>3</sub>O [M+H<sup>+</sup>]: 256.1444, found 256.1441.

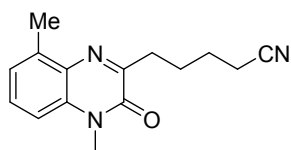

5-(4,8-dimethyl-3-oxo-3,4-dihydroquinoxalin-2-yl)pentanenitrile (**3ga**). Yellow solid; (14.8 mg, 58%); mp: 114-116 °C;  $R_f$  = 0.25 (petroleum ether/ethyl acetate 3:1); <sup>1</sup>H NMR (400 MHz, CDCl<sub>3</sub>):  $\delta$  = 7.42 (t,  $J$  = 8.0 Hz, 1H), 7.21 (d,  $J$  = 7.6 Hz, 1H), 7.15 (d,  $J$  = 7.6 Hz, 1H), 3.70 (s, 3H), 3.00 (t,  $J$  = 7.2 Hz, 2H), 2.68 (s, 3H), 2.45 (t,  $J$  = 7.2 Hz, 2H), 2.06-1.98 (m, 2H), 1.87-1.80 (m, 2H) ppm; <sup>13</sup>C NMR (101 MHz, CDCl<sub>3</sub>):  $\delta$  157.5, 154.8, 138.5, 133.1, 131.1, 129.5, 124.9, 119.7, 111.4, 32.6, 29.2, 25.0, 24.9, 17.5, 17.0 ppm. ESI-HRMS:  $m/z$  Calcd for C<sub>15</sub>H<sub>18</sub>N<sub>3</sub>O [M+H<sup>+</sup>]: 256.1444, found 256.1441.

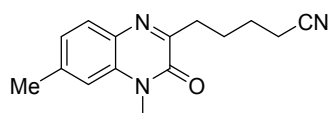

5-(4,6-dimethyl-3-oxo-3,4-dihydroquinoxalin-2-yl)pentanenitrile (**3ga'**). Yellow solid; (8.2 mg, 32%); mp: 115-117 °C;  $R_f$  = 0.20 (petroleum ether/ethyl acetate 3:1);  $^1\text{H}$  NMR (400 MHz,  $\text{CDCl}_3$ ):  $\delta$  = 7.70 (d,  $J$  = 7.2 Hz, 1H), 7.18-7.16 (m, 1H), 7.10 (s, 1H), 3.69 (s, 3H), 2.97 (t,  $J$  = 7.2 Hz, 2H), 2.52 (s, 3H), 2.43 (t,  $J$  = 7.2 Hz, 2H), 2.01-1.93 (m, 2H), 1.85-1.78 (m, 2H) ppm;  $^{13}\text{C}$  NMR (101 MHz,  $\text{CDCl}_3$ ):  $\delta$  158.4, 155.0, 140.5, 132.9, 130.8, 129.4, 124.9, 119.7, 113.7, 32.8, 29.0, 25.5, 25.1, 22.0, 17.0 ppm. ESI-HRMS:  $m/z$  Calcd for  $\text{C}_{15}\text{H}_{18}\text{N}_3\text{O}$  [ $\text{M}+\text{H}^+$ ]: 256.1444, found 256.1441.

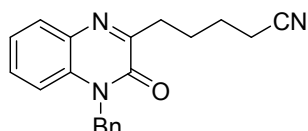

5-(4-benzyl-3-oxo-3,4-dihydroquinoxalin-2-yl)pentanenitrile (**3ha**). Yellow solid; (15.2 mg, 48%); mp: 135-137 °C;  $R_f$  = 0.25 (petroleum ether/ethyl acetate 3:1);  $^1\text{H}$  NMR (400 MHz,  $\text{CDCl}_3$ ):  $\delta$  = 7.85-7.83 (m, 1H), 7.44-7.39 (m, 1H), 7.34-7.28 (m, 3H), 7.24-7.22 (m, 5H), 5.50 (s, 3H), 3.05 (t,  $J$  = 7.2 Hz, 2H), 2.07-1.99 (m, 2H), 1.89-1.82 (m, 2H) ppm;  $^{13}\text{C}$  NMR (101 MHz,  $\text{CDCl}_3$ ):  $\delta$  159.8, 154.9, 135.2, 132.9, 132.4, 129.9, 129.8, 128.9, 127.7, 126.8, 123.7, 119.6, 114.4, 45.9, 32.9, 25.4, 25.2, 17.1 ppm. ESI-HRMS:  $m/z$  Calcd for  $\text{C}_{20}\text{H}_{19}\text{N}_3\text{O}$  [ $\text{M}+\text{H}^+$ ]: 317.1528, found 317.1530.

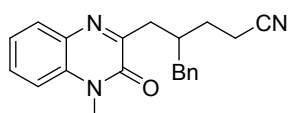

4-benzyl-5-(4-methyl-3-oxo-3,4-dihydroquinoxalin-2-yl)pentanenitrile (**3ab**). Yellow oil; (15.9 mg, 48%);  $R_f$  = 0.50 (petroleum ether/ethyl acetate 3:1);  $^1\text{H}$  NMR (400 MHz,  $\text{CDCl}_3$ ):  $\delta$  = 7.86-7.84 (m, 1H), 7.57-7.52 (m, 1H), 7.38-7.33 (m, 1H), 7.30-7.19 (m, 5H), 7.17-7.13 (m, 1H), 3.67 (s, 3H), 2.94 (d,  $J$  = 6.0 Hz, 2H), 2.84-2.77 (m, 1H), 2.71-2.63 (m, 2H), 2.42 (t,  $J$  = 8.0 Hz, 2H), 1.80-1.75 (m, 2H) ppm;  $^{13}\text{C}$  NMR (101 MHz,  $\text{CDCl}_3$ ):  $\delta$  158.9, 154.9, 139.5, 133.0, 129.9, 129.8, 129.2, 128.3, 126.2, 123.6, 119.8, 113.6, 40.3, 37.6, 36.7, 29.5, 29.1, 14.8 ppm. ESI-HRMS:  $m/z$  Calcd for  $\text{C}_{21}\text{H}_{22}\text{N}_3\text{O}$  [ $\text{M}+\text{H}^+$ ]: 332.1757, found 332.1759.

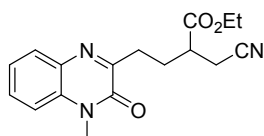

ethyl 2-(cyanomethyl)-4-(4-methyl-3-oxo-3,4-dihydroquinoxalin-2-yl)butanoate (**3ac**). Yellow oil; (14.4 mg, 46%);  $R_f$  = 0.20 (petroleum ether/ethyl acetate 3:1);  $^1\text{H}$  NMR (400 MHz,  $\text{CDCl}_3$ ):  $\delta$  = 7.85-7.83 (m, 1H), 7.57-7.53 (m, 1H), 7.38-7.33 (m, 1H), 7.32-7.30 (m, 1H), 4.19 (q,  $J$  = 14.0 Hz,  $J$  = 7.2 Hz, 2H), 3.71 (s, 3H), 3.09-2.98 (m, 2H), 2.96-2.89 (m, 1H), 2.81-2.67 (m, 2H), 2.35-2.20 (m, 2H), 1.28 (t,  $J$  = 7.2 Hz, 3H) ppm;  $^{13}\text{C}$  NMR (101 MHz,  $\text{CDCl}_3$ ):  $\delta$  172.4, 158.8, 154.7, 133.0, 132.5, 129.9, 129.8, 123.7, 117.8, 113.6, 61.4, 41.0, 30.5, 29.0, 27.5, 19.5, 14.1 ppm. ESI-HRMS:  $m/z$  Calcd for  $\text{C}_{17}\text{H}_{20}\text{N}_3\text{O}_3$  [ $\text{M}+\text{H}^+$ ]: 314.1499, found 314.1495.

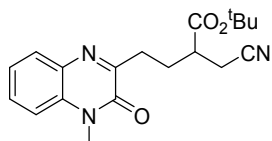

*tert-butyl 2-(cyanomethyl)-4-(4-methyl-3-oxo-3,4-dihydroquinoxalin-2-yl)butanoate (3ad)*. Yellow solid; (16.0 mg, 47%); mp: 123-125 °C;  $R_f$  = 0.20 (petroleum ether/ethyl acetate 3:1);  $^1\text{H NMR}$  (400 MHz,  $\text{CDCl}_3$ ):  $\delta$  = 7.85-7.83 (m, 1H), 7.57-7.53 (m, 1H), 7.37-7.33 (m, 1H), 7.32-7.30 (m, 1H), 3.71 (s, 3H), 3.04-3.00 (m, 2H), 2.85-2.78 (m, 1H), 2.75-2.61 (m, 2H), 2.30-2.15 (m, 2H), 1.49 (s, 9H) ppm;  $^{13}\text{C NMR}$  (101 MHz,  $\text{CDCl}_3$ ):  $\delta$  171.7, 158.9, 154.7, 133.0, 132.5, 129.9, 129.8, 123.7, 117.9, 113.6, 82.1, 41.8, 30.6, 29.0, 28.0, 27.8, 19.6 ppm. ESI-HRMS:  $m/z$  Calcd for  $\text{C}_{19}\text{H}_{24}\text{N}_3\text{O}_3$   $[\text{M}+\text{H}^+]$ : 342.1812, found 342.1815.

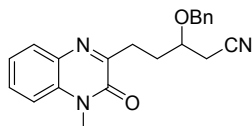

*3-(benzyloxy)-5-(4-methyl-3-oxo-3,4-dihydroquinoxalin-2-yl)pentanenitrile (3ae)*. Yellow oil; (15.6 mg, 45%);  $R_f$  = 0.20 (petroleum ether/ethyl acetate 3:1);  $^1\text{H NMR}$  (400 MHz,  $\text{CDCl}_3$ ):  $\delta$  = 7.82-7.79 (m, 1H), 7.55-7.50 (m, 1H), 7.36-7.32 (m, 1H), 7.28-7.21 (m, 6H), 4.59 (q,  $J$  = 30.8 Hz,  $J$  = 7.2 Hz, 2H), 3.94-3.88 (m, 1H), 3.62 (s, 3H), 3.06 (t,  $J$  = 7.2 Hz, 2H), 2.67 (d,  $J$  = 6.0 Hz, 2H), 2.23 (q,  $J$  = 13.6 Hz,  $J$  = 7.2 Hz, 2H) ppm;  $^{13}\text{C NMR}$  (101 MHz,  $\text{CDCl}_3$ ):  $\delta$  159.6, 154.7, 137.4, 133.0, 132.5, 129.7, 129.6, 128.3, 127.7, 123.6, 117.6, 113.6, 74.0, 71.6, 30.6, 29.4, 28.9, 22.9 ppm. ESI-HRMS:  $m/z$  Calcd for  $\text{C}_{21}\text{H}_{23}\text{N}_3\text{O}_2$   $[\text{M}+\text{H}^+]$ : 347.1634, found 347.1631.

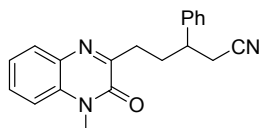

*5-(4-methyl-3-oxo-3,4-dihydroquinoxalin-2-yl)-3-phenylpentanenitrile (3af)*. Yellow solid; (16.7 mg, 53%); mp: 151-153 °C;  $R_f$  = 0.30 (petroleum ether/ethyl acetate 3:1);  $^1\text{H NMR}$  (400 MHz,  $\text{CDCl}_3$ ):  $\delta$  = 7.84-7.82 (m, 1H), 7.55-7.51 (m, 1H), 7.37-7.32 (m, 2H), 7.31-7.22 (m, 5H), 3.66 (s, 3H), 3.19-3.11 (m, 1H), 3.89-2.84 (m, 2H), 2.71-2.69 (m, 2H), 2.37-2.30 (m, 2H) ppm;  $^{13}\text{C NMR}$  (101 MHz,  $\text{CDCl}_3$ ):  $\delta$  159.6, 154.7, 141.1, 133.0, 132.6, 129.8, 129.7, 128.9, 127.5, 127.4, 123.6, 118.5, 113.5, 41.9, 31.7, 31.3, 29.0, 25.3 ppm. ESI-HRMS:  $m/z$  Calcd for  $\text{C}_{20}\text{H}_{19}\text{N}_3\text{O}$   $[\text{M}+\text{H}^+]$ : 317.1528, found 317.1531.

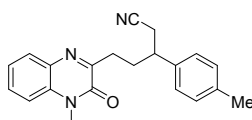

*5-(4-methyl-3-oxo-3,4-dihydroquinoxalin-2-yl)-3-(p-tolyl)pentanenitrile (3ag)*. Yellow oil; (13.2 mg, 41%);  $R_f$  = 0.20 (petroleum ether/ethyl acetate 3:1);  $^1\text{H NMR}$  (400 MHz,  $\text{CDCl}_3$ ):  $\delta$  = 7.83-7.81 (m, 1H), 7.54-7.50 (m, 1H), 7.36-7.32 (m, 1H), 7.28-7.26 (m, 1H), 7.16-7.10 (m, 4H), 3.65 (s, 3H), 3.14-3.07 (m, 1H), 2.87-2.84 (m, 2H), 2.68-2.66 (m, 2H), 2.35-2.31 (m, 2H), 2.29 (s, 3H) ppm;  $^{13}\text{C NMR}$  (101 MHz,  $\text{CDCl}_3$ ):  $\delta$  159.7, 154.6, 138.0, 137.0, 133.0, 132.8, 129.708, 129.687, 129.5, 127.2, 123.6, 118.6, 113.5, 41.6, 31.8, 31.3, 28.9, 25.4, 21.0 ppm. ESI-HRMS:  $m/z$  Calcd for  $\text{C}_{21}\text{H}_{21}\text{N}_3\text{O}$   $[\text{M}+\text{H}^+]$ : 331.1685, found 331.1687.

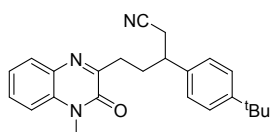

*3-(4-(tert-butyl)phenyl)-5-(4-methyl-3-oxo-3,4-dihydroquinoxalin-2-yl)pentanenitrile (3ah)*.

Yellow solid; (20.1 mg, 54%); mp: 155-157 °C;  $R_f$  = 0.20 (petroleum ether/ethyl acetate 3:1);  $^1\text{H}$  NMR (400 MHz,  $\text{CDCl}_3$ ):  $\delta$  = 7.84-7.81 (m, 1H), 7.54-7.50 (m, 1H), 7.36-7.28 (m, 4H), 7.20-7.18 (m, 2H), 3.66 (s, 3H), 3.16-3.09 (m, 1H), 2.88 (t,  $J$  = 8.0 Hz, 2H), 2.69-2.67 (m, 2H), 2.37-2.31 (m, 2H), 1.28 (s, 9H) ppm;  $^{13}\text{C}$  NMR (101 MHz,  $\text{CDCl}_3$ ):  $\delta$  159.7, 154.7, 150.2, 138.0, 133.0, 132.6, 129.7, 127.0, 125.7, 123.6, 118.7, 113.5, 41.4, 34.4, 31.8, 31.3, 31.1, 29.7, 28.9, 25.3 ppm. ESI-HRMS:  $m/z$  Calcd for  $\text{C}_{24}\text{H}_{28}\text{N}_3\text{O}$  [ $\text{M}+\text{H}^+$ ]: 374.2227, found 374.2229.

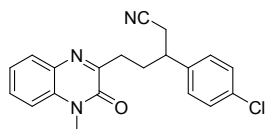

*3-(4-chlorophenyl)-5-(4-methyl-3-oxo-3,4-dihydroquinoxalin-2-yl)pentanenitrile (3ai)*. Yellow solid; (13.6 mg, 39%); mp: 141-143 °C;  $R_f$  = 0.20 (petroleum ether/ethyl acetate 3:1);  $^1\text{H}$  NMR (400 MHz,  $\text{CDCl}_3$ ):  $\delta$  = 7.83-7.81 (m, 1H), 7.56-7.52 (m, 1H), 7.37-7.33 (m, 1H), 7.30-7.26 (m, 3H), 7.21-7.19 (m, 2H), 3.65 (s, 3H), 3.17-3.10 (m, 1H), 2.86 (t,  $J$  = 8.0 Hz, 2H), 2.69-2.66 (m, 2H), 2.35-2.28 (m, 2H) ppm;  $^{13}\text{C}$  NMR (101 MHz,  $\text{CDCl}_3$ ):  $\delta$  159.3, 154.6, 139.5, 133.2, 133.0, 132.5, 129.9, 129.7, 129.0, 128.8, 123.7, 118.1, 113.6, 41.4, 31.7, 31.2, 29.0, 25.2 ppm. ESI-HRMS:  $m/z$  Calcd for  $\text{C}_{20}\text{H}_{18}\text{ClN}_3\text{O}$  [ $\text{M}+\text{H}^+$ ]: 351.1138, found 351.1135.

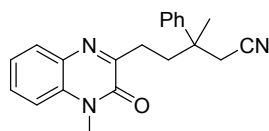

*3-methyl-5-(4-methyl-3-oxo-3,4-dihydroquinoxalin-2-yl)-3-phenylpentanenitrile (3aj)*. Yellow solid; (16.2 mg, 49%); mp: 129-131 °C;  $R_f$  = 0.35 (petroleum ether/ethyl acetate 3:1);  $^1\text{H}$  NMR (400 MHz,  $\text{CDCl}_3$ ):  $\delta$  = 7.81 (d,  $J$  = 8.0 Hz, 1H), 7.52 (t,  $J$  = 8.0 Hz, 1H), 7.39-7.24 (m, 6H), 7.20-7.17 (m, 1H), 3.63 (s, 3H), 2.86-2.65 (m, 4H), 2.53-2.45 (m, 1H), 2.28-2.21 (m, 1H), 1.66 (s, 3H) ppm;  $^{13}\text{C}$  NMR (101 MHz,  $\text{CDCl}_3$ ):  $\delta$  159.8, 154.6, 143.3, 133.0, 132.6, 129.7, 129.6, 128.6, 126.8, 125.9, 123.6, 118.1, 113.5, 40.1, 37.7, 31.9, 29.5, 28.9, 24.8 ppm. ESI-HRMS:  $m/z$  Calcd for  $\text{C}_{21}\text{H}_{22}\text{N}_3\text{O}$  [ $\text{M}+\text{H}^+$ ]: 332.1757, found 332.1755.

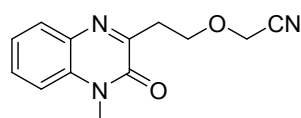

*2-(2-(4-methyl-3-oxo-3,4-dihydroquinoxalin-2-yl)ethoxy)acetonitrile (3ak)*. Yellow solid; (10.9 mg, 45%); mp: 119-121 °C;  $R_f$  = 0.25 (petroleum ether/ethyl acetate 3:1);  $^1\text{H}$  NMR (400 MHz,  $\text{CDCl}_3$ ):  $\delta$  = 7.87-7.85 (m, 1H), 7.58-7.54 (m, 1H), 7.38-7.31 (m, 2H), 4.32 (s, 3H), 4.15 (t,  $J$  = 6.4 Hz, 2H), 3.71 (s, 3H), 2.82 (t,  $J$  = 5.6 Hz, 2H) ppm;  $^{13}\text{C}$  NMR (101 MHz,  $\text{CDCl}_3$ ):  $\delta$  157.1, 154.8, 133.2, 132.6, 130.1, 130.0, 123.7, 116.0, 113.7, 68.4, 56.2, 33.8, 29.1 ppm. ESI-HRMS:  $m/z$  Calcd for  $\text{C}_{13}\text{H}_{14}\text{N}_3\text{O}_2$  [ $\text{M}+\text{H}^+$ ]: 244.1081, found 244.1078.

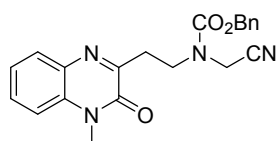

*benzyl (cyanomethyl)(2-(4-methyl-3-oxo-3,4-dihydroquinoxalin-2-yl)ethyl)carbamate (3al)*. Yellow oil; (23.6 mg, 63%);  $R_f$  = 0.20 (petroleum ether/ethyl acetate 3:1);  $^1\text{H}$  NMR (400 MHz,  $\text{CDCl}_3$ ):  $\delta$  = 7.79 (d,  $J$  = 8.0 Hz, 1H), 7.55 (t,  $J$  = 8.0 Hz, 1H), 7.37-7.23 (m, 7H), 5.09-5.03 (m, 2H),



4.45-4.38 (m, 2H), 3.94 (t,  $J = 6.4$  Hz, 1H), 3.68-3.58 (m, 3H), 3.29-3.23 (m, 2H) ppm;  $^{13}\text{C}$  NMR (101 MHz,  $\text{CDCl}_3$ ):  $\delta$  157.4, 155.6, 154.7, 135.6, 133.1, 132.3, 130.1, 129.6, 129.3, 128.5, 128.2, 128.0, 127.7, 123.7, 115.9, 113.7, 68.1, 45.2, 44.4, 36.2, 32.8, 32.5, 28.9 ppm. ESI-HRMS:  $m/z$  Calcd for  $\text{C}_{21}\text{H}_{20}\text{N}_4\text{O}_3$  [ $\text{M}+\text{H}^+$ ]: 376.1535, found 376.1539.

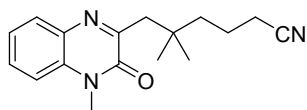

*5,5-dimethyl-6-(4-methyl-3-oxo-3,4-dihydroquinoxalin-2-yl)hexanenitrile (3am)*. Yellow oil; (16.2 mg, 57%);  $R_f = 0.25$  (petroleum ether/ethyl acetate 3:1);  $^1\text{H}$  NMR (400 MHz,  $\text{CDCl}_3$ ):  $\delta = 7.85$ -7.83 (m, 1H), 7.56-7.52 (m, 1H), 7.37-7.32 (m, 1H), 7.31-7.29 (m, 1H), 3.70 (s, 3H), 2.92 (s, 2H), 2.36 (t,  $J = 7.2$  Hz, 2H), 1.85-1.79 (m, 2H), 1.53-1.48 (m, 2H), 1.04 (s, 6H) ppm;  $^{13}\text{C}$  NMR (101 MHz,  $\text{CDCl}_3$ ):  $\delta$  159.5, 155.5, 133.1, 132.5, 129.915, 129.872, 123.6, 119.9, 113.6, 42.4, 41.0, 29.3, 27.5, 20.6, 17.9 ppm. ESI-HRMS:  $m/z$  Calcd for  $\text{C}_{17}\text{H}_{22}\text{N}_3\text{O}$  [ $\text{M}+\text{H}^+$ ]: 284.1757, found 284.1756.

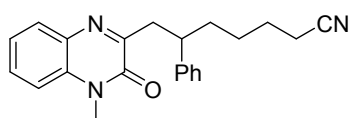

*7-(4-methyl-3-oxo-3,4-dihydroquinoxalin-2-yl)-6-phenylheptanenitrile (3an)*. Yellow oil; (14.5 mg, 42%);  $R_f = 0.45$  (petroleum ether/ethyl acetate 3:1);  $^1\text{H}$  NMR (400 MHz,  $\text{CDCl}_3$ ):  $\delta = 7.80$  (t,  $J = 8.0$  Hz, 1H), 7.51 (t,  $J = 8.0$  Hz, 1H), 7.33 (t,  $J = 8.0$  Hz, 1H), 7.28-7.24 (m, 5H), 7.18-7.13 (m, 1H), 3.67 (s, 3H), 3.49-3.41 (m, 1H), 3.32-3.19 (m, 2H), 2.31-2.18 (m, 2H), 1.81-1.70 (m, 2H), 1.68-1.55 (m, 2H), 1.39-1.25 (m, 3H) ppm;  $^{13}\text{C}$  NMR (101 MHz,  $\text{CDCl}_3$ ):  $\delta$  159.2, 155.0, 144.4, 133.0, 132.6, 129.749, 129.695, 128.4, 127.8, 126.3, 123.6, 119.8, 113.6, 42.5, 41.0, 35.1, 29.1, 26.6, 25.4, 17.0 ppm. ESI-HRMS:  $m/z$  Calcd for  $\text{C}_{22}\text{H}_{24}\text{N}_3\text{O}$  [ $\text{M}+\text{H}^+$ ]: 346.1914, found 346.1911.

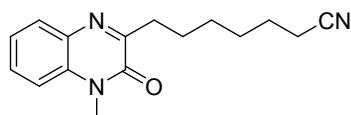

*7-(4-methyl-3-oxo-3,4-dihydroquinoxalin-2-yl)heptanenitrile (3ao)*. Yellow oil; (6.8 mg, 23%);  $R_f = 0.26$  (petroleum ether/ethyl acetate 3:1);  $^1\text{H}$  NMR (400 MHz,  $\text{CDCl}_3$ ):  $\delta = 7.76$  (s, 1H), 7.34-7.27 (m, 1H), 7.14 (d,  $J = 7.6$  Hz, 1H), 3.50 (s, 3H), 1.71-1.53 (m, 8H), 1.48-1.43 (m, 2H), 1.27-1.24 (m, 2H) ppm;  $^{13}\text{C}$  NMR (101 MHz,  $\text{CDCl}_3$ ):  $\delta$  163.6, 159.8, 153.1, 142.6, 129.3, 128.0, 127.2, 108.4, 37.1, 32.9, 25.2, 23.7 ppm. ESI-HRMS:  $m/z$  Calcd for  $\text{C}_{17}\text{H}_{22}\text{N}_3\text{O}$  [ $\text{M}+\text{H}^+$ ]: 270.1601, found 270.1605.

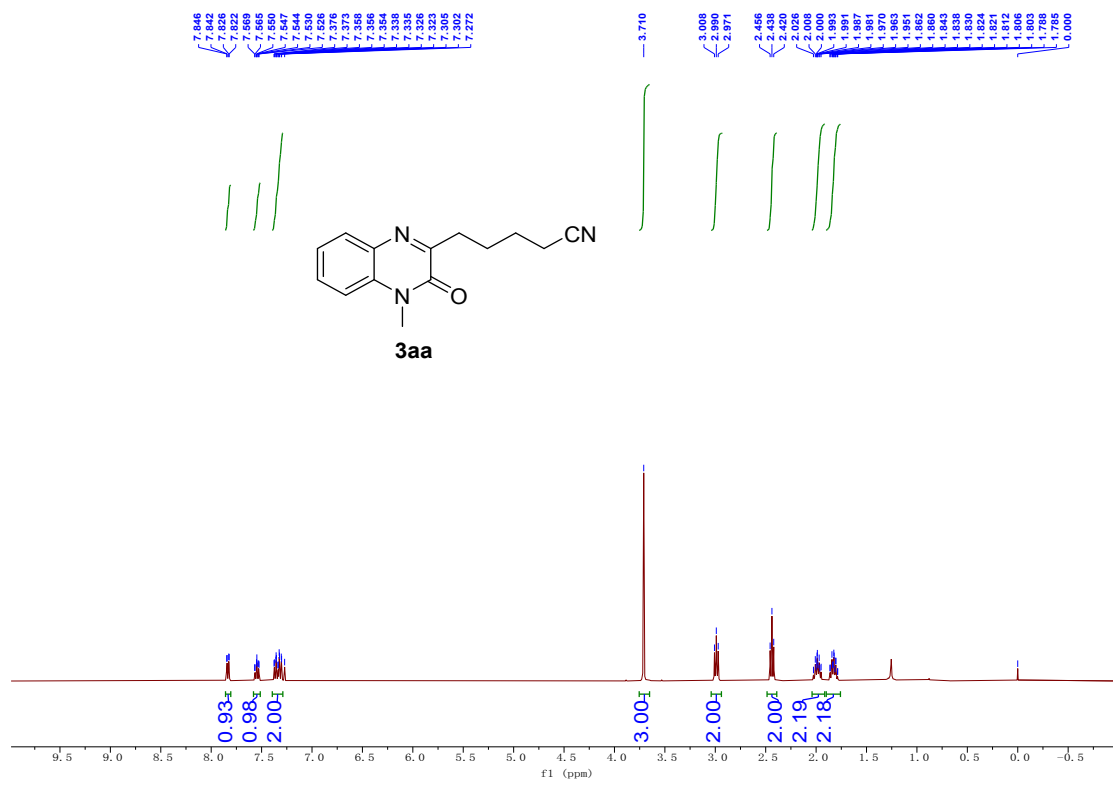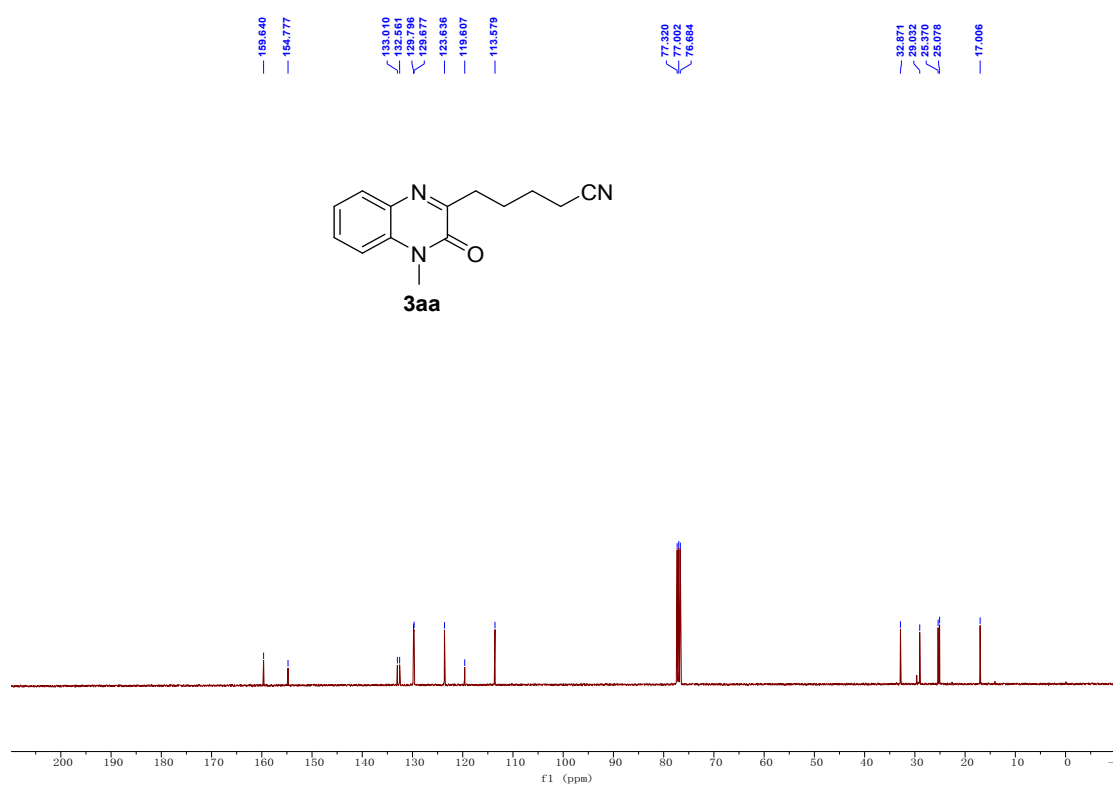

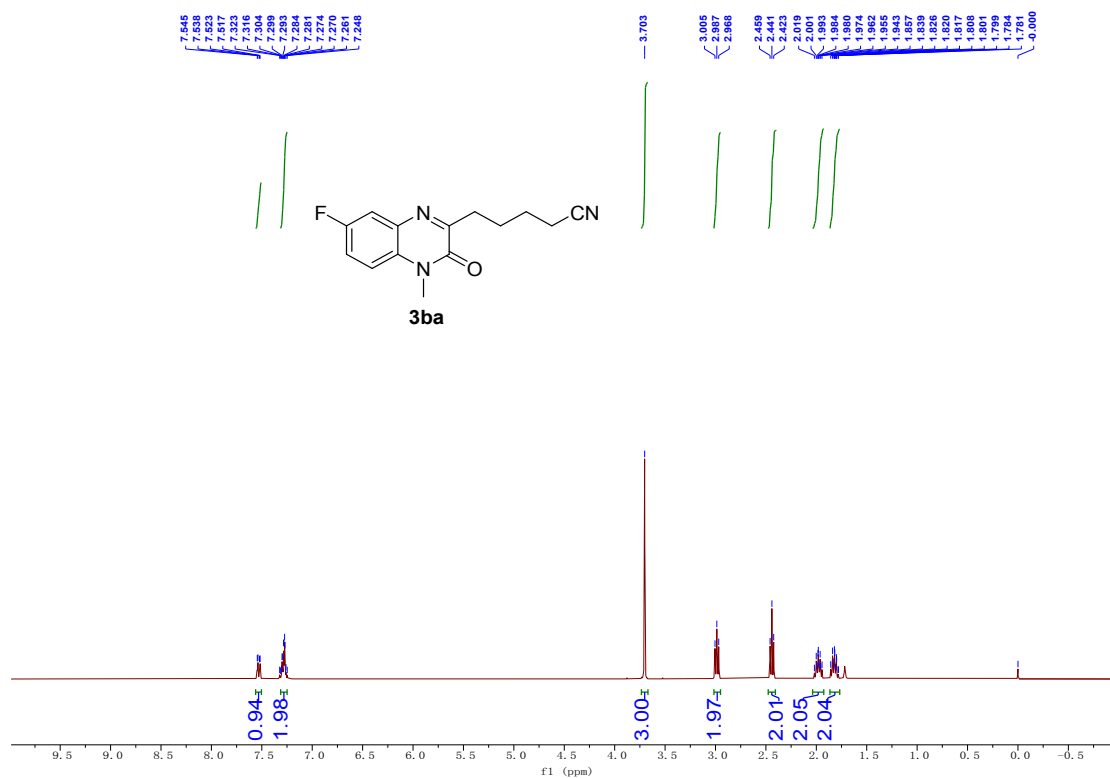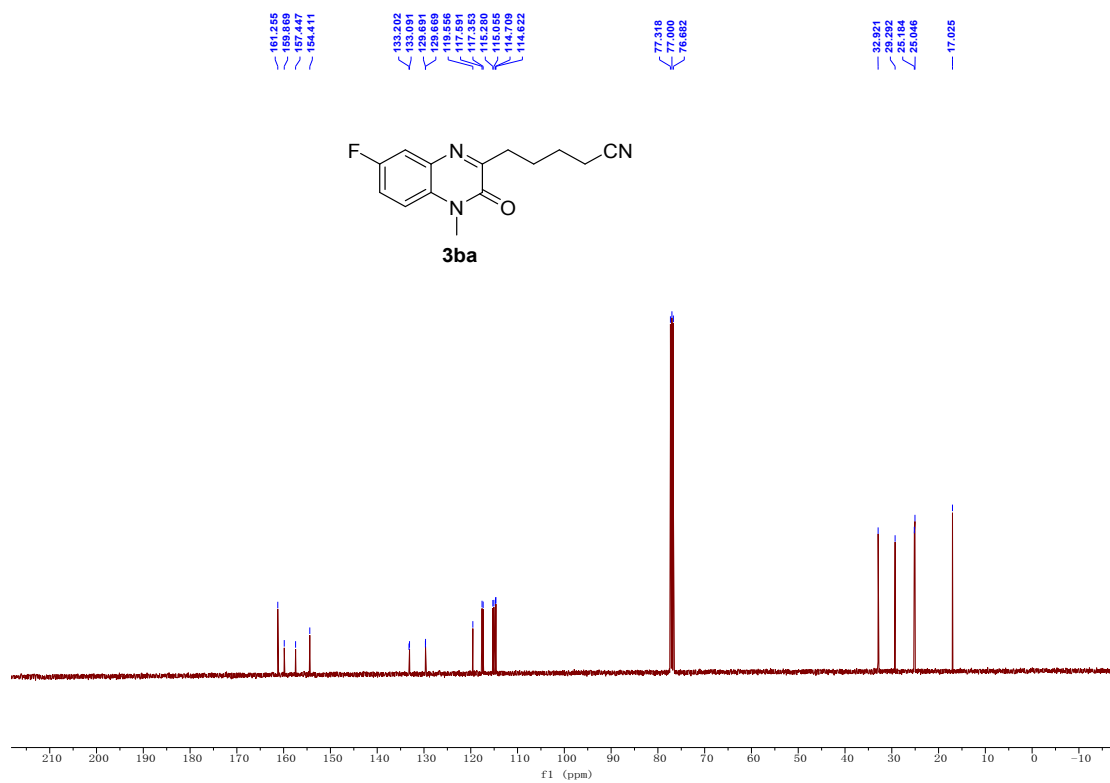

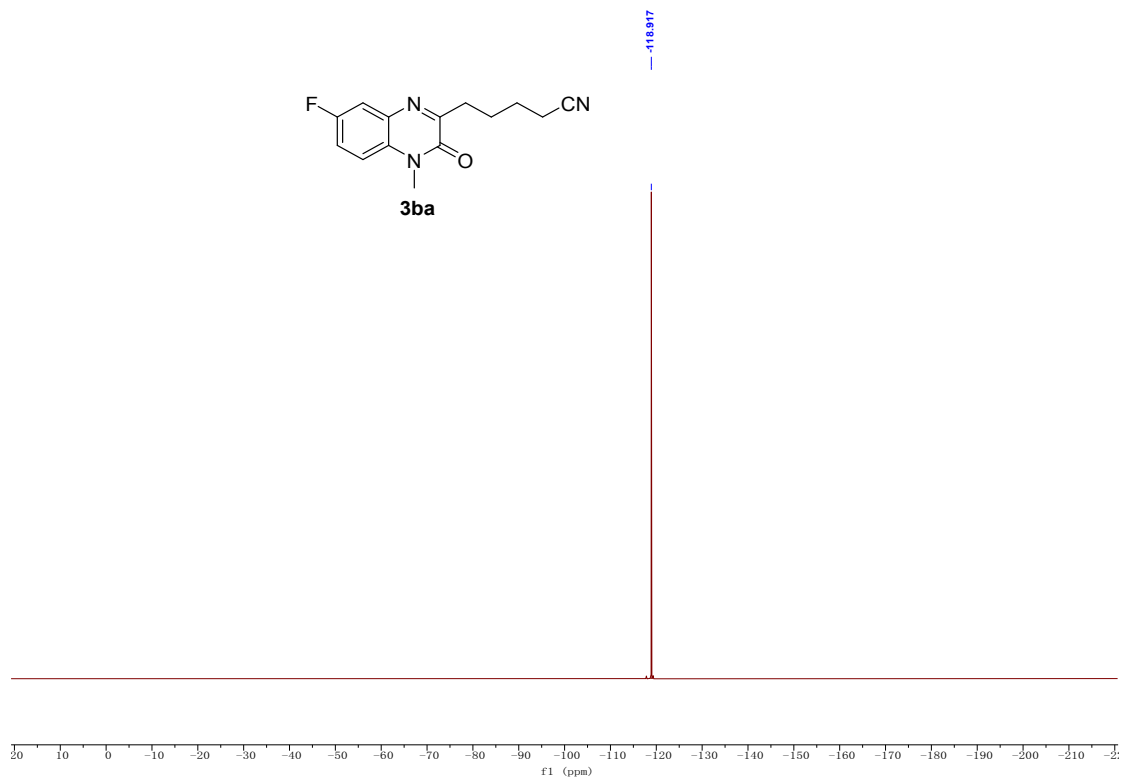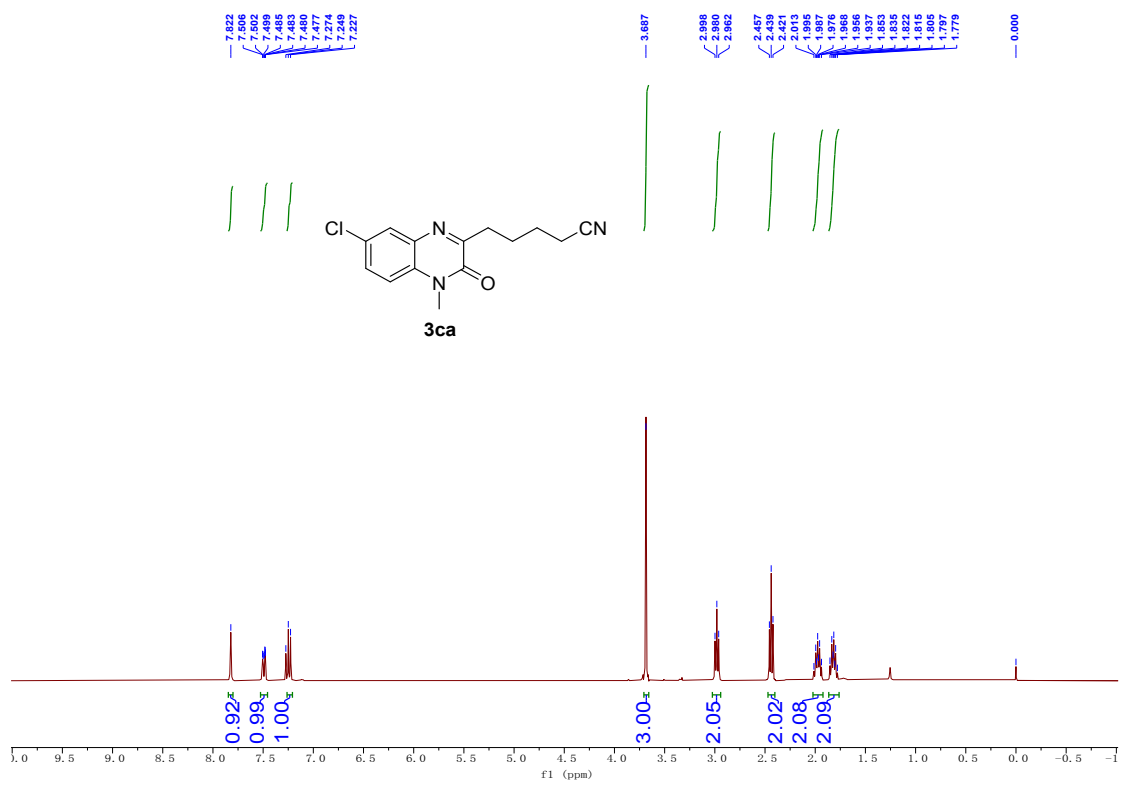

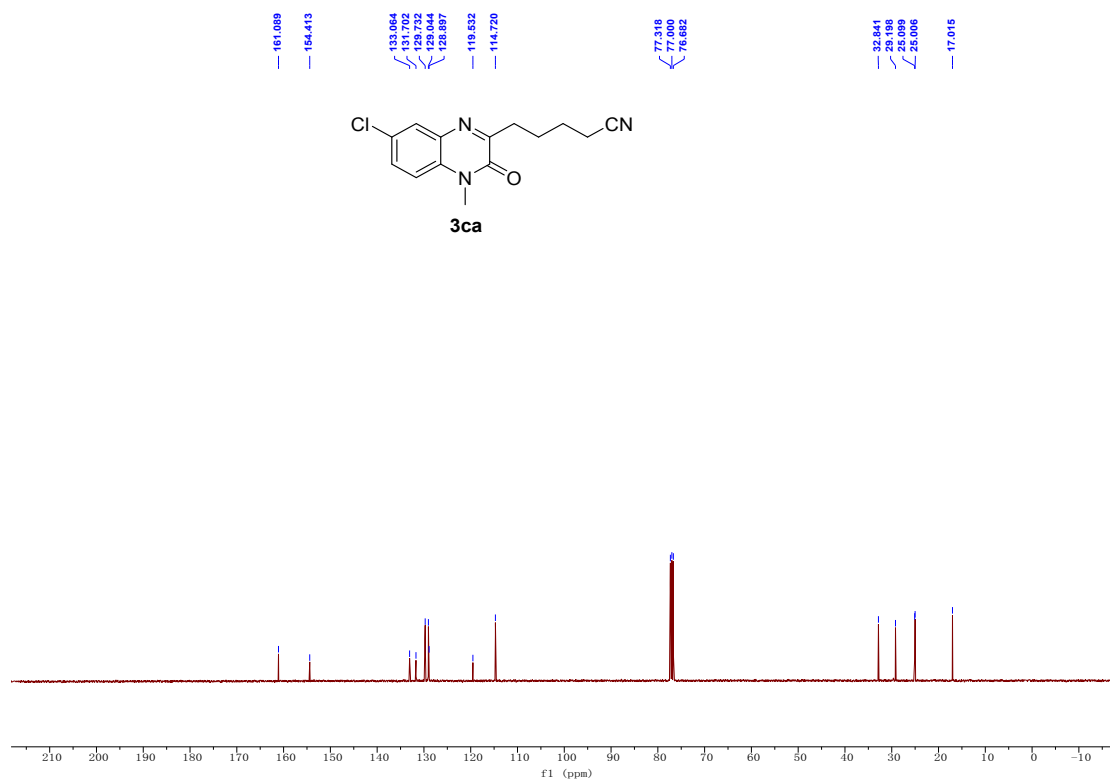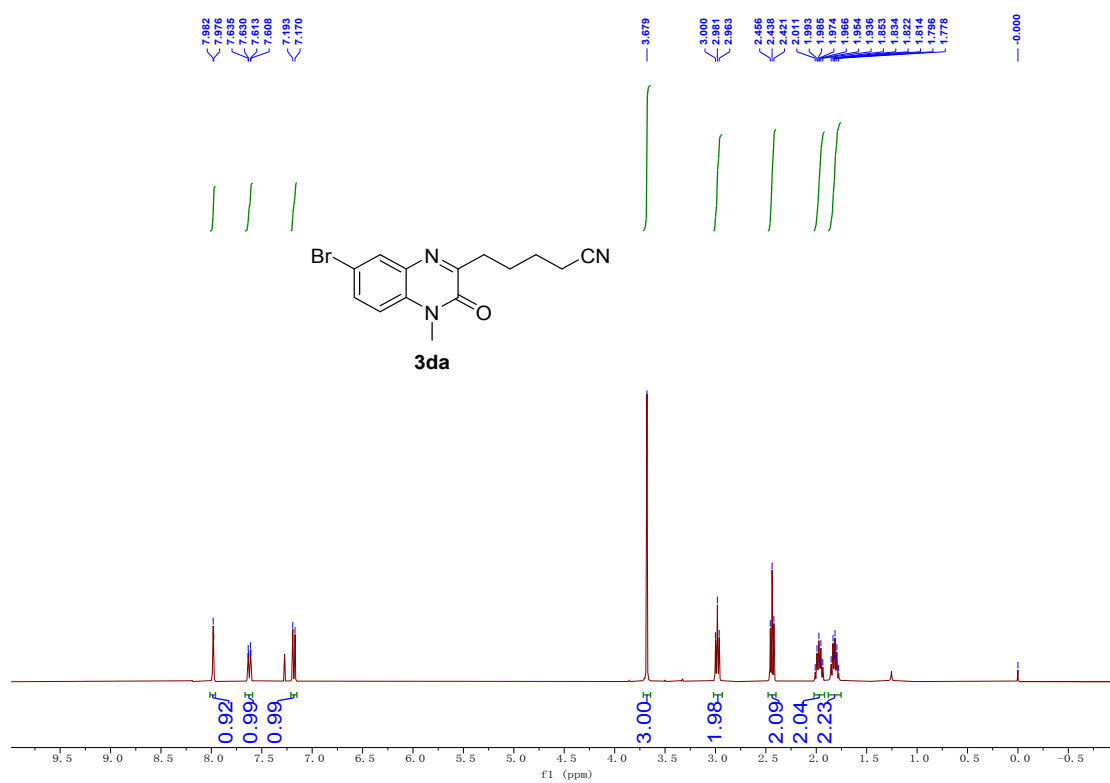

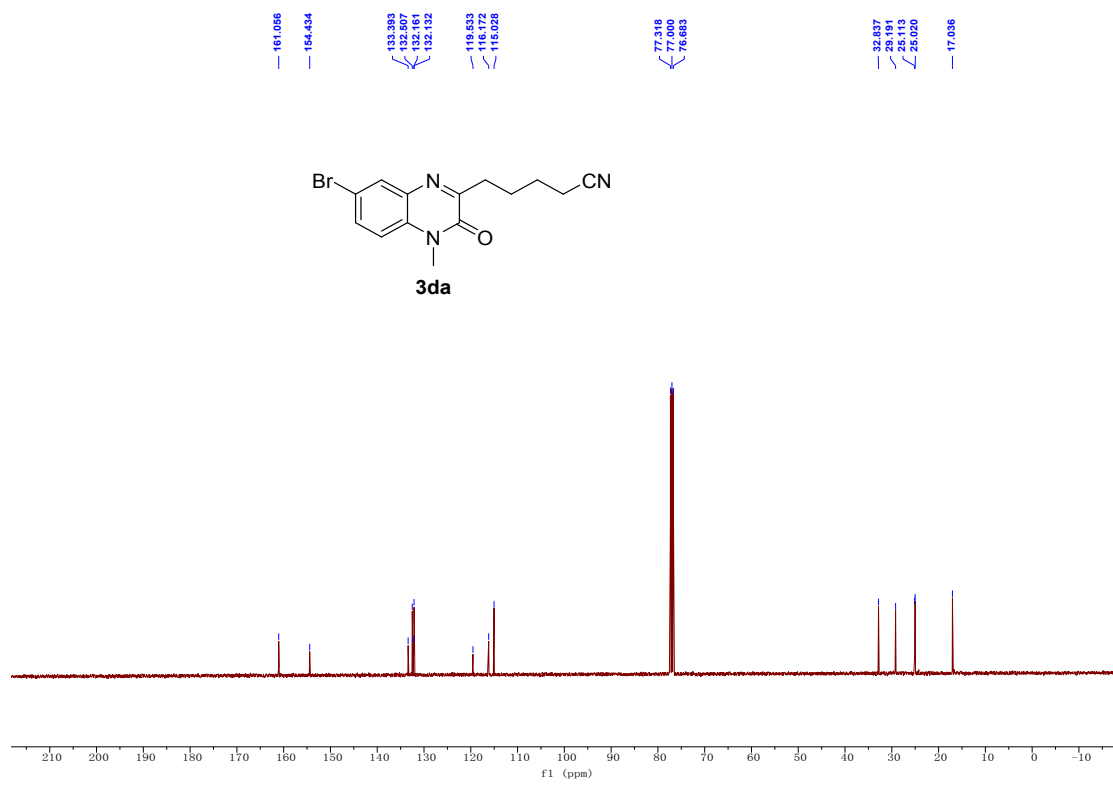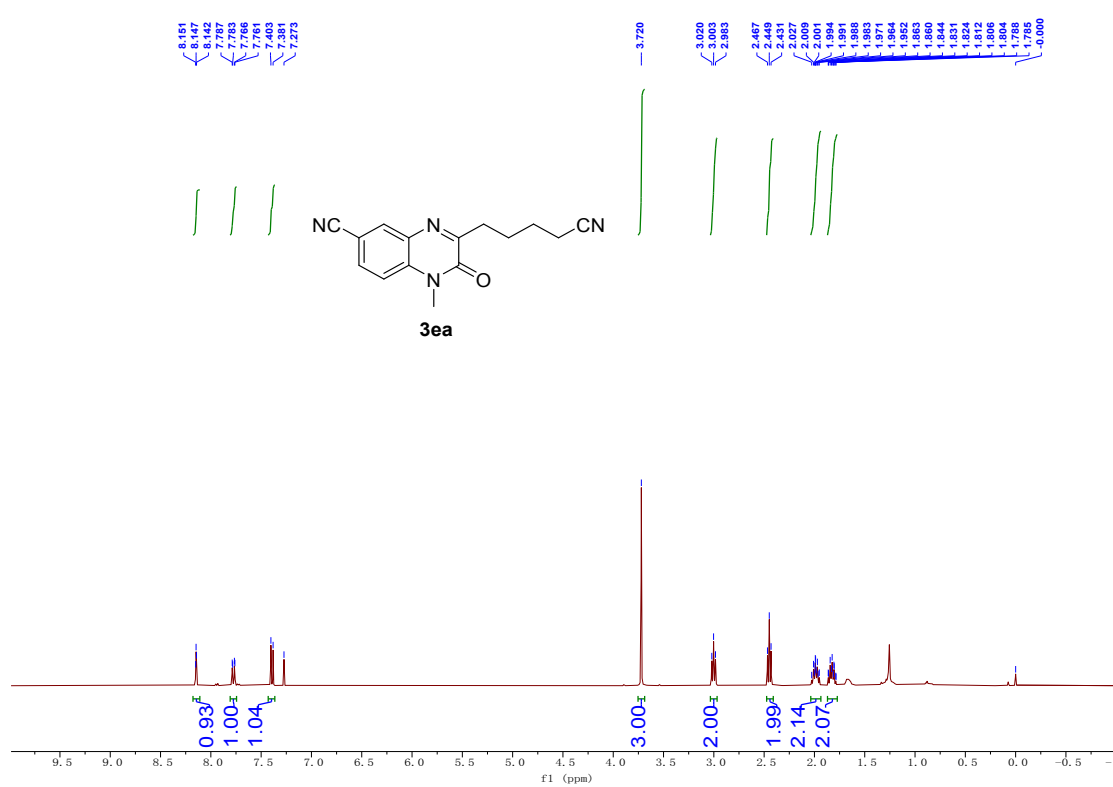

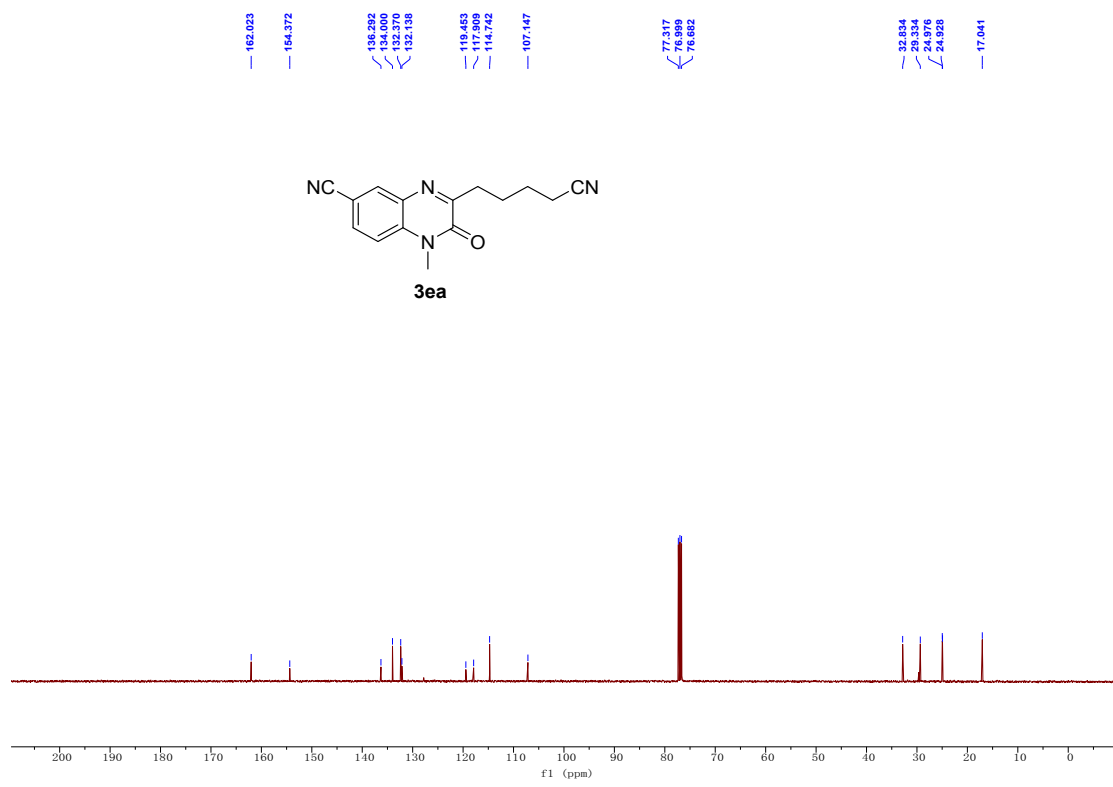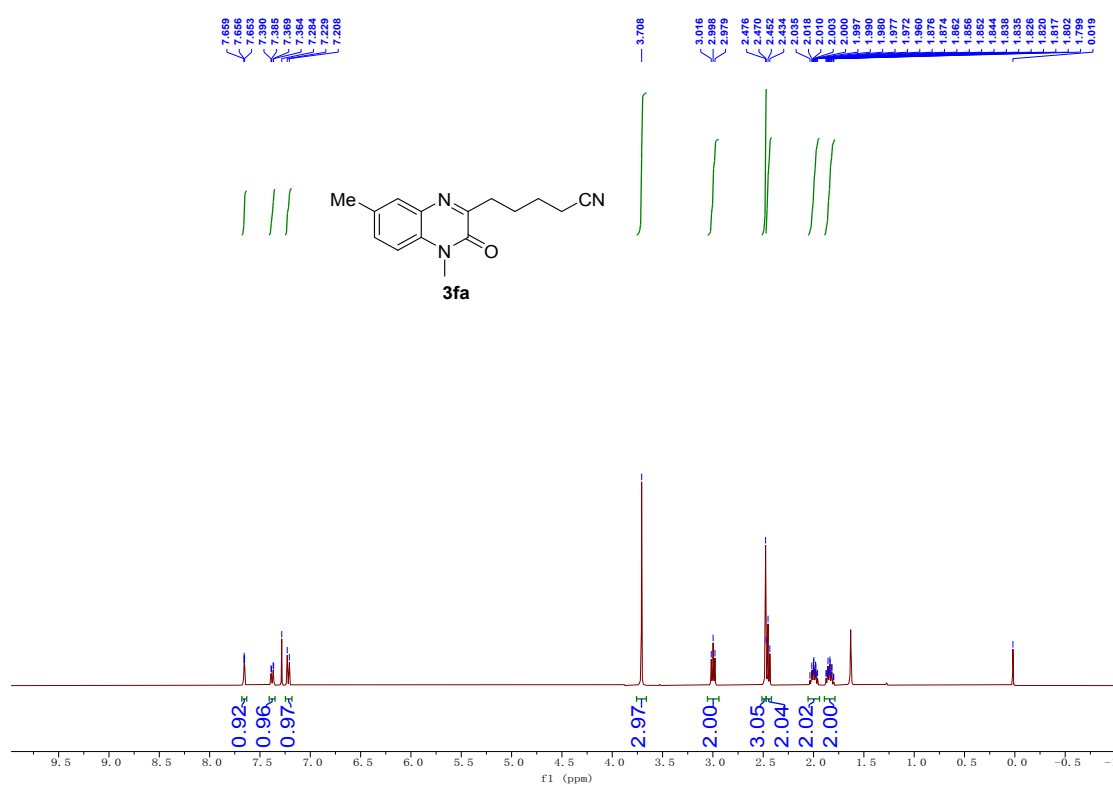

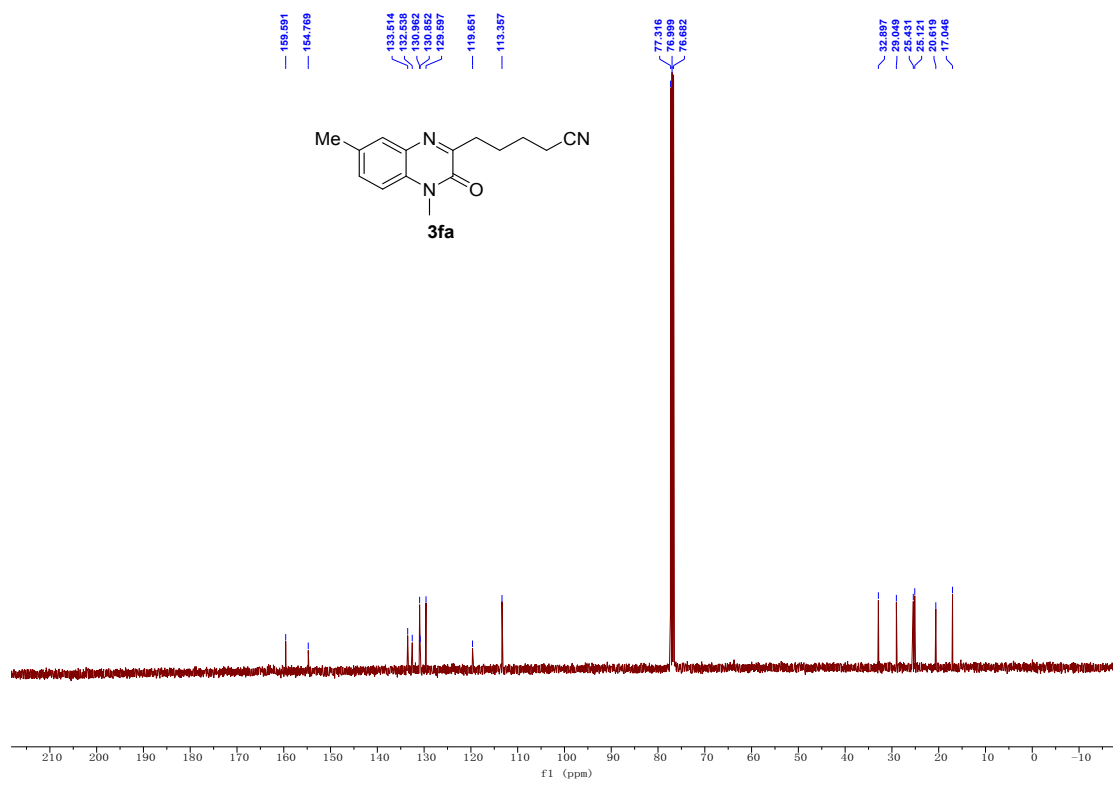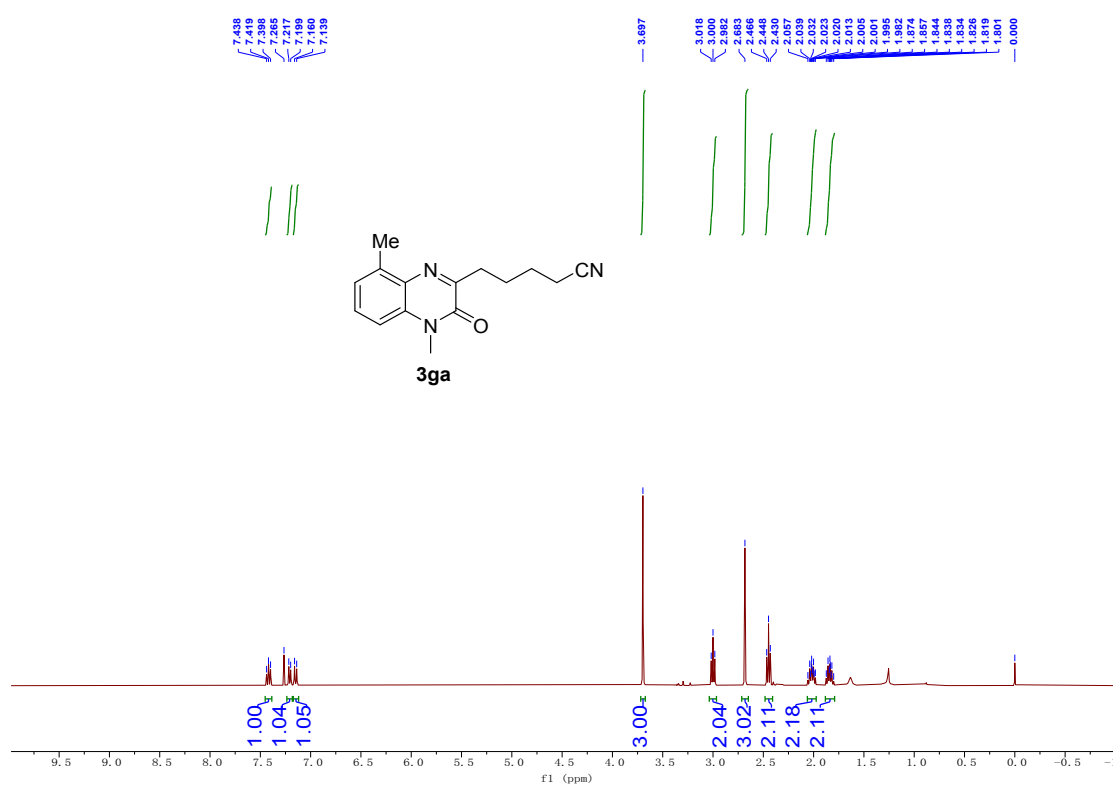



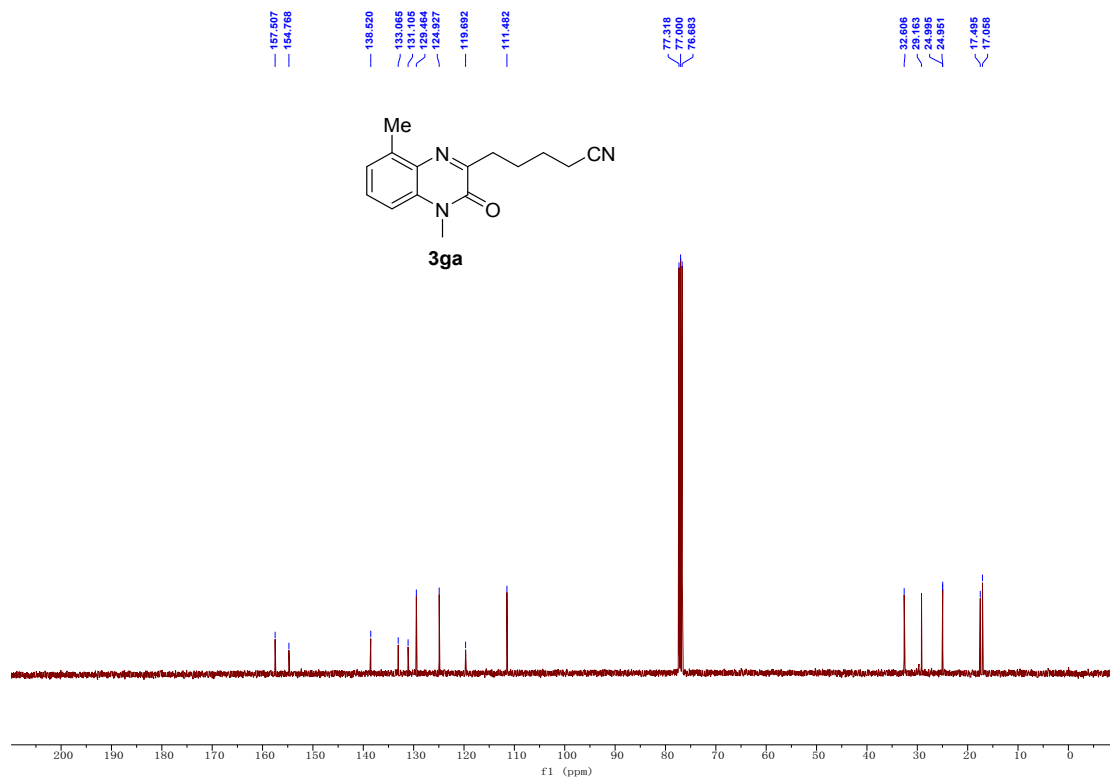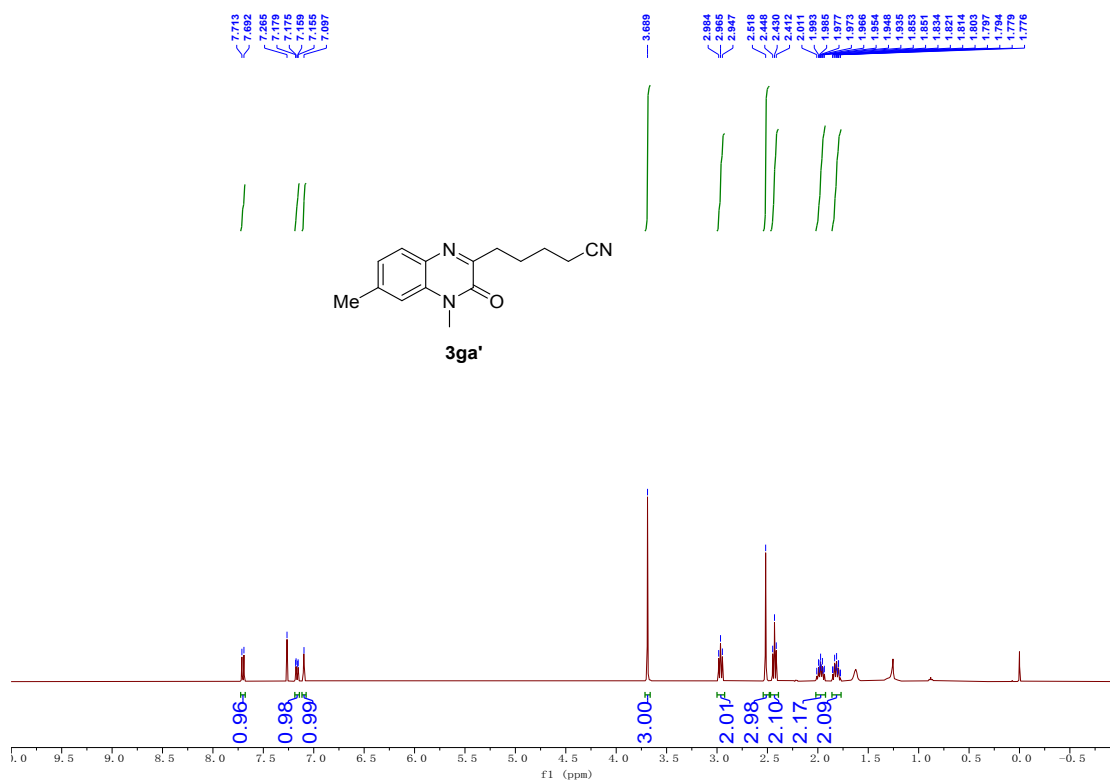

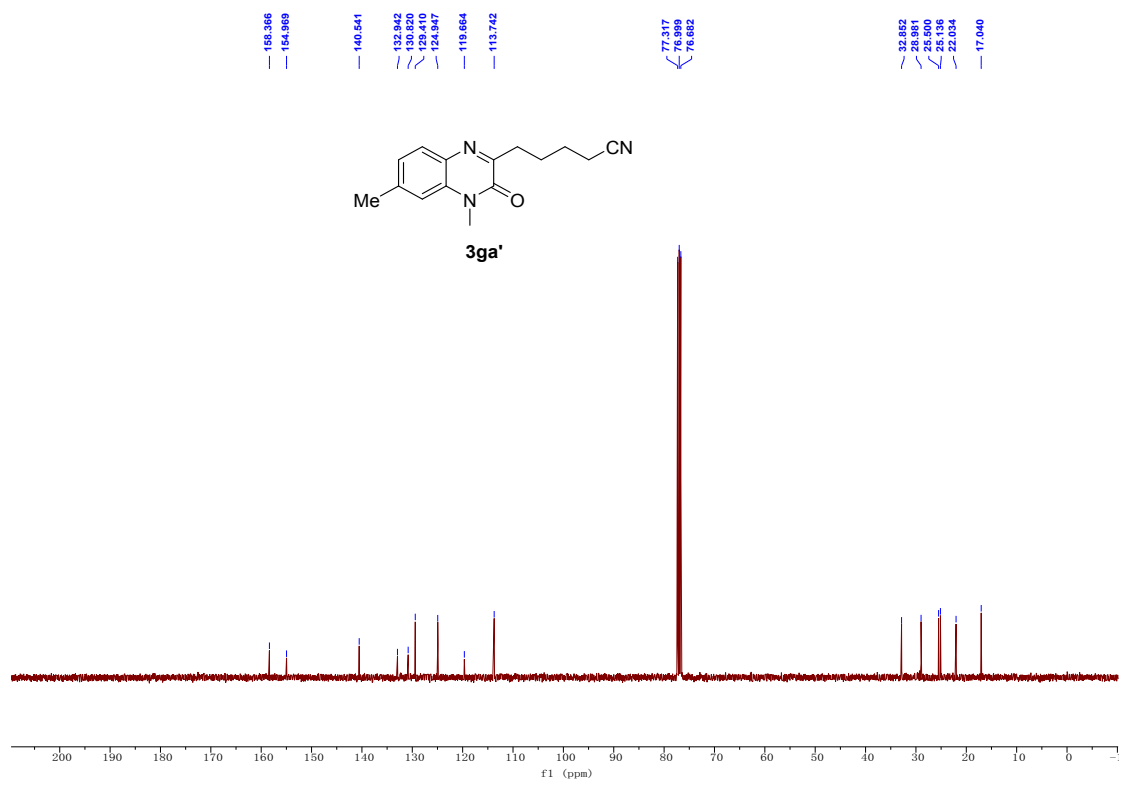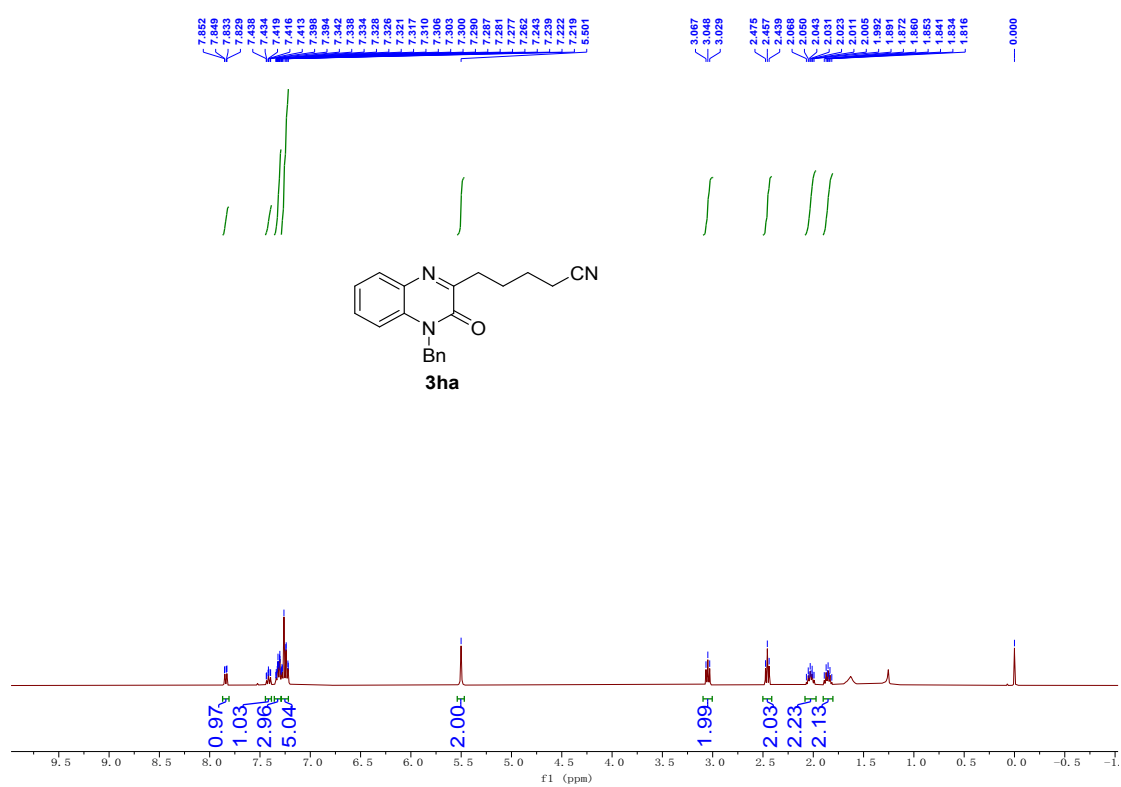

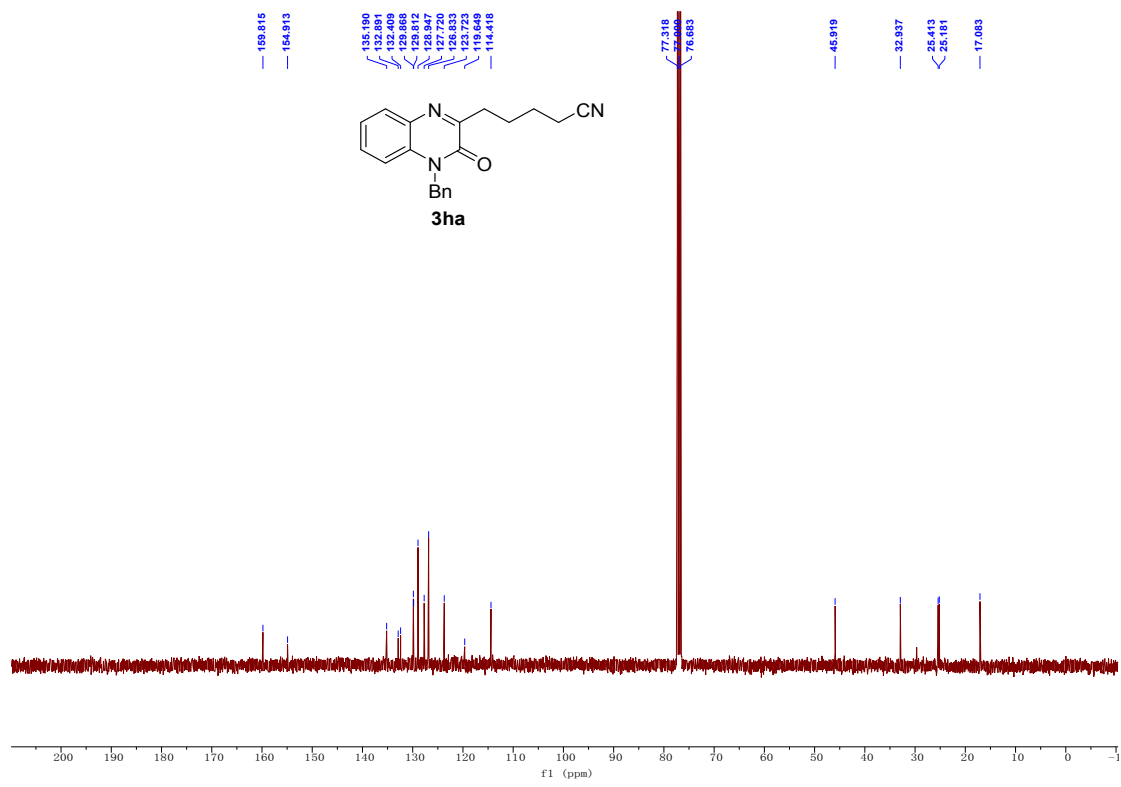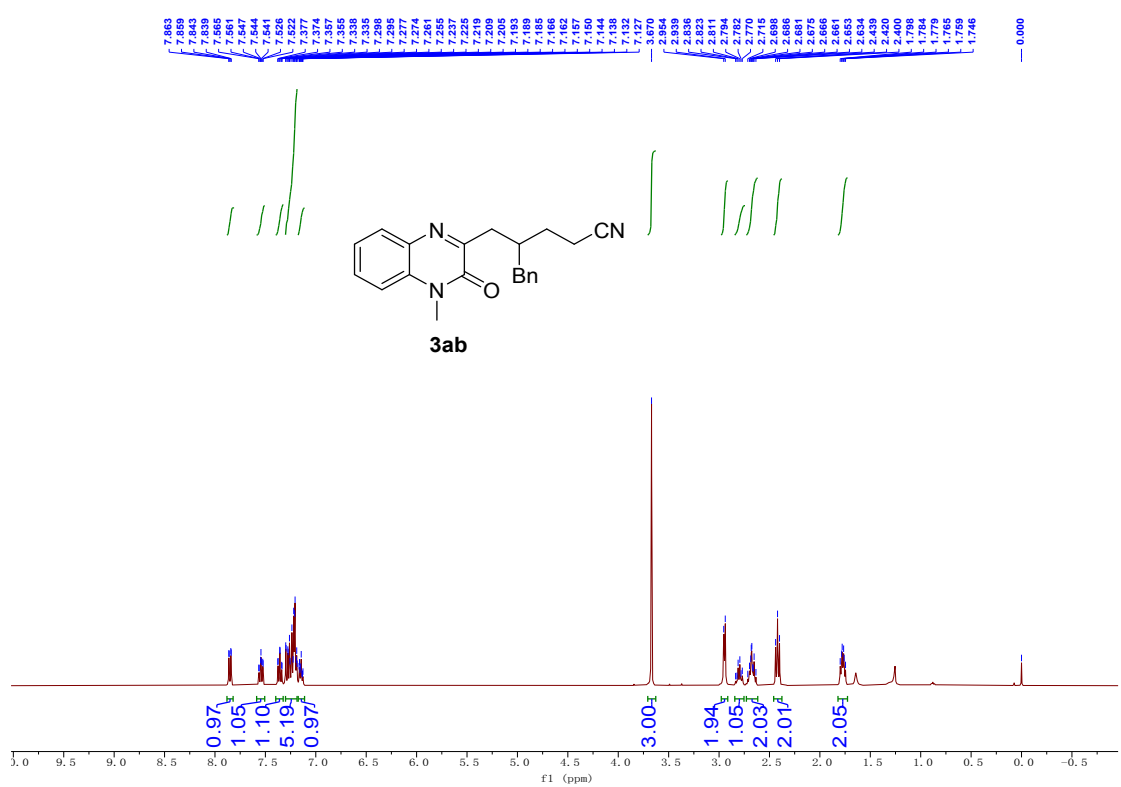

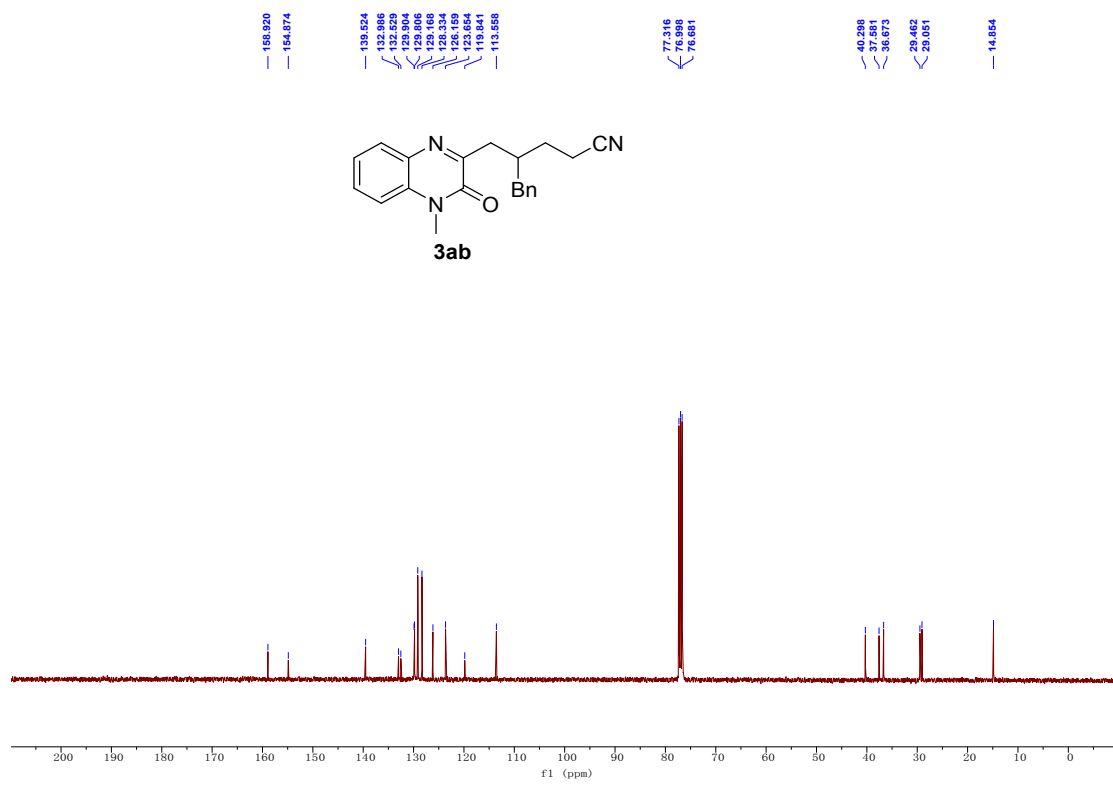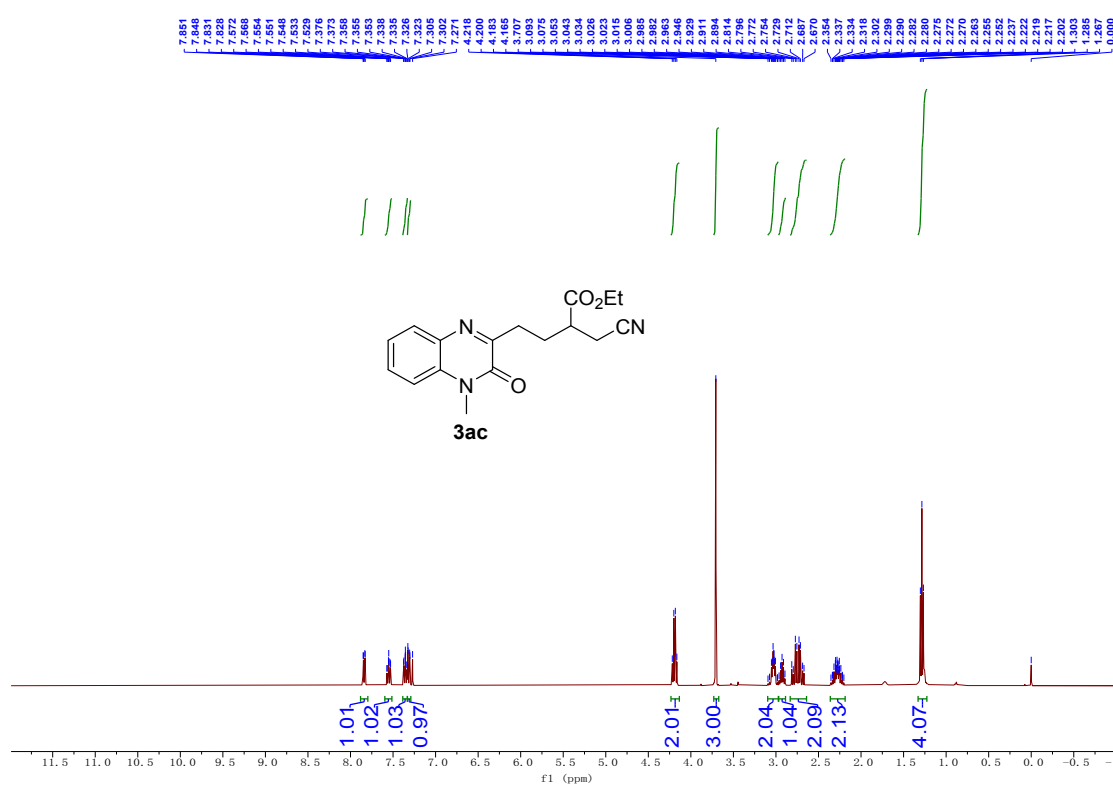

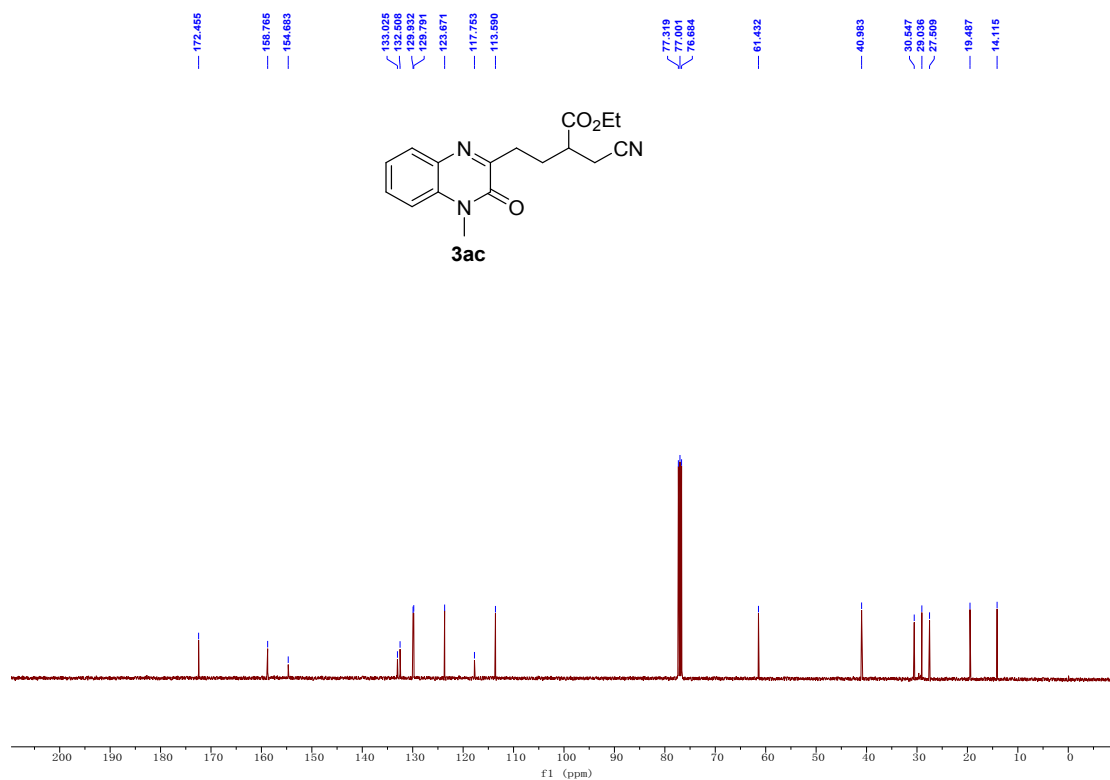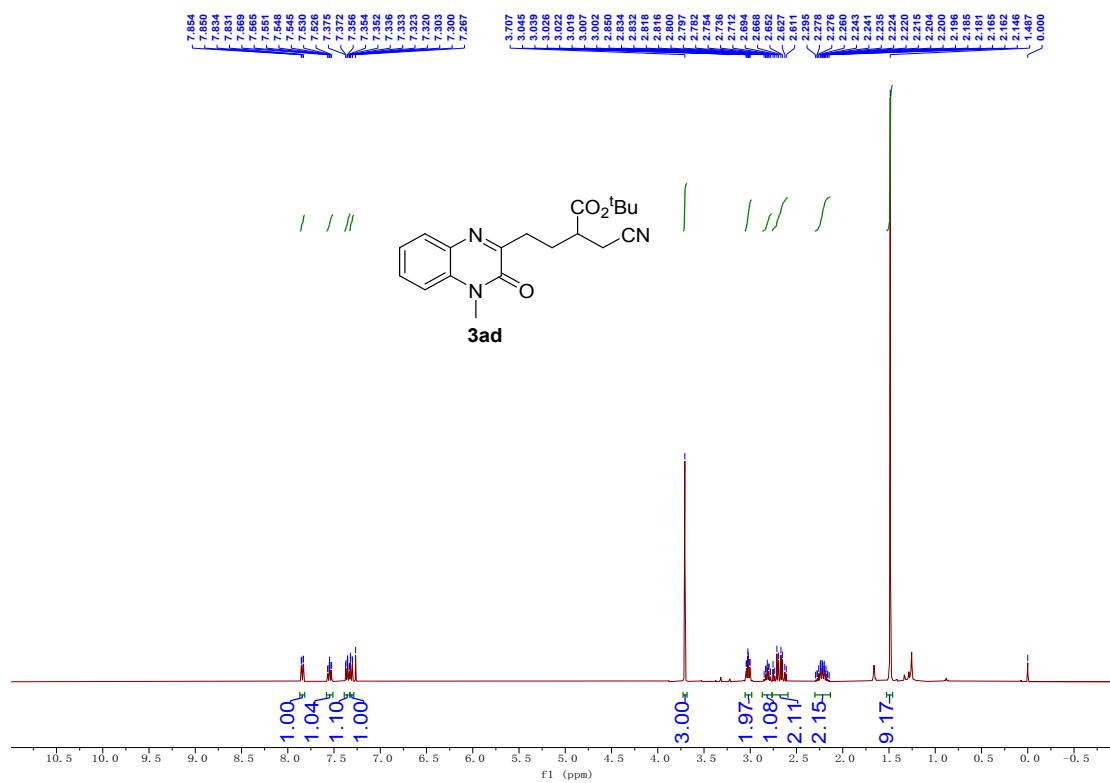

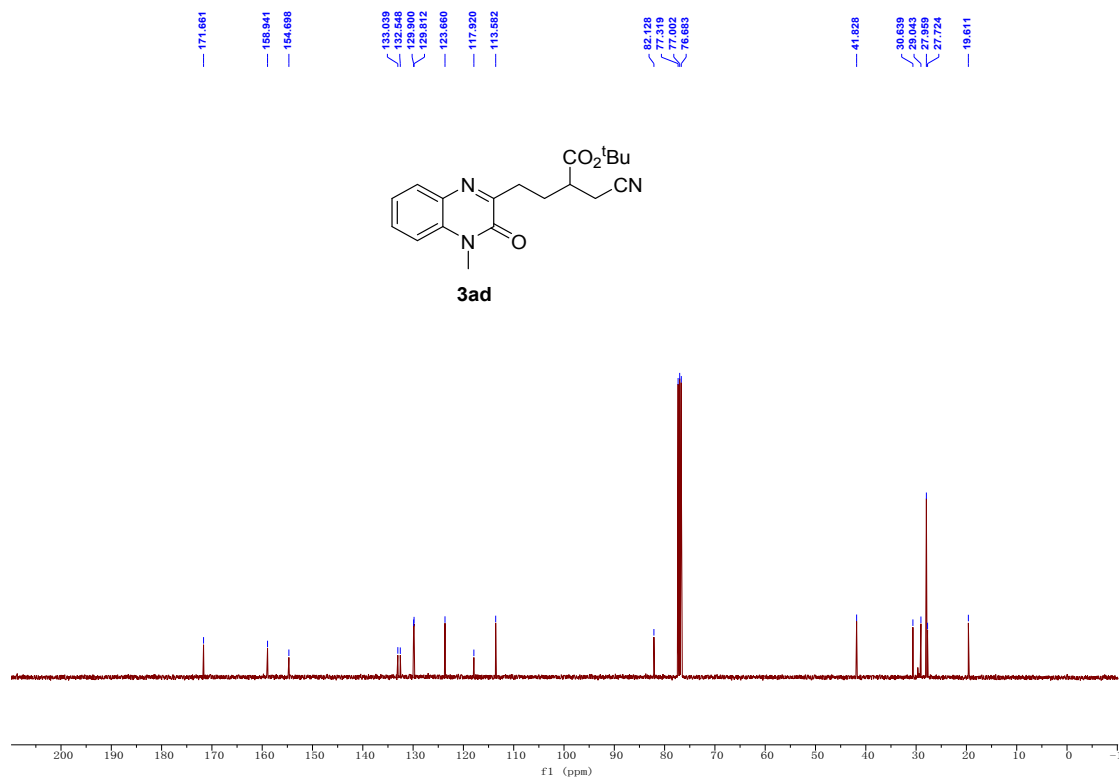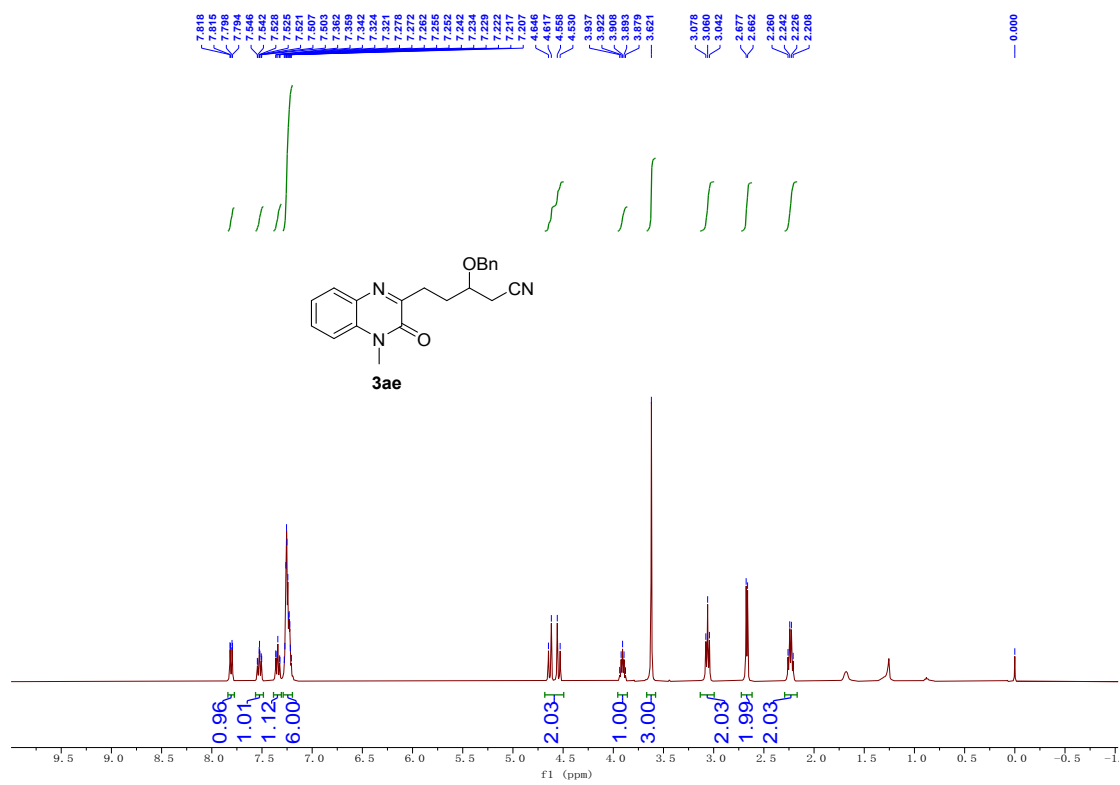

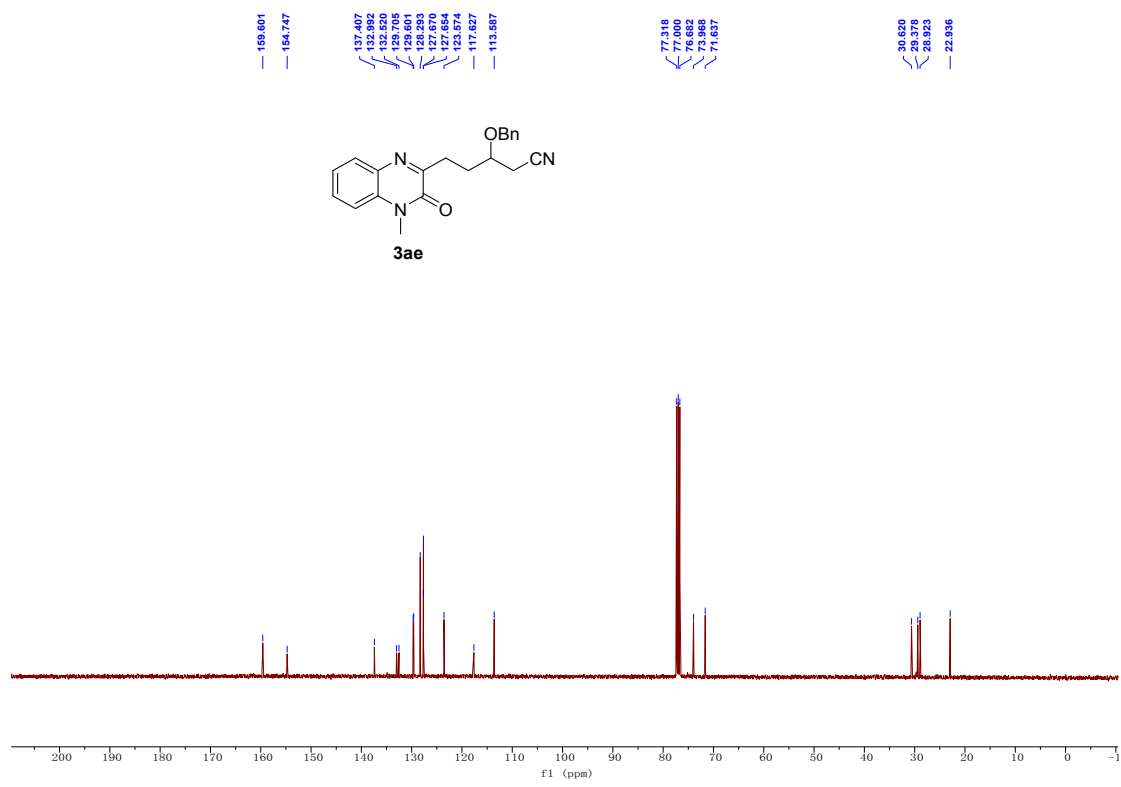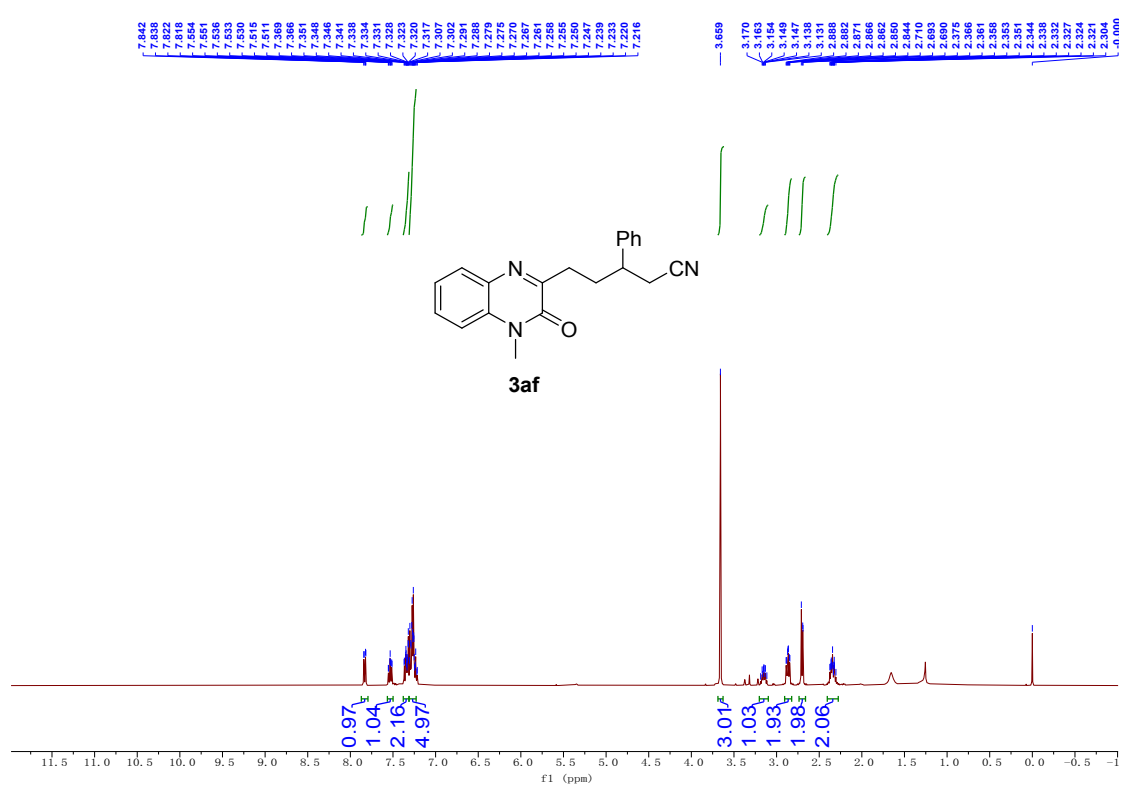

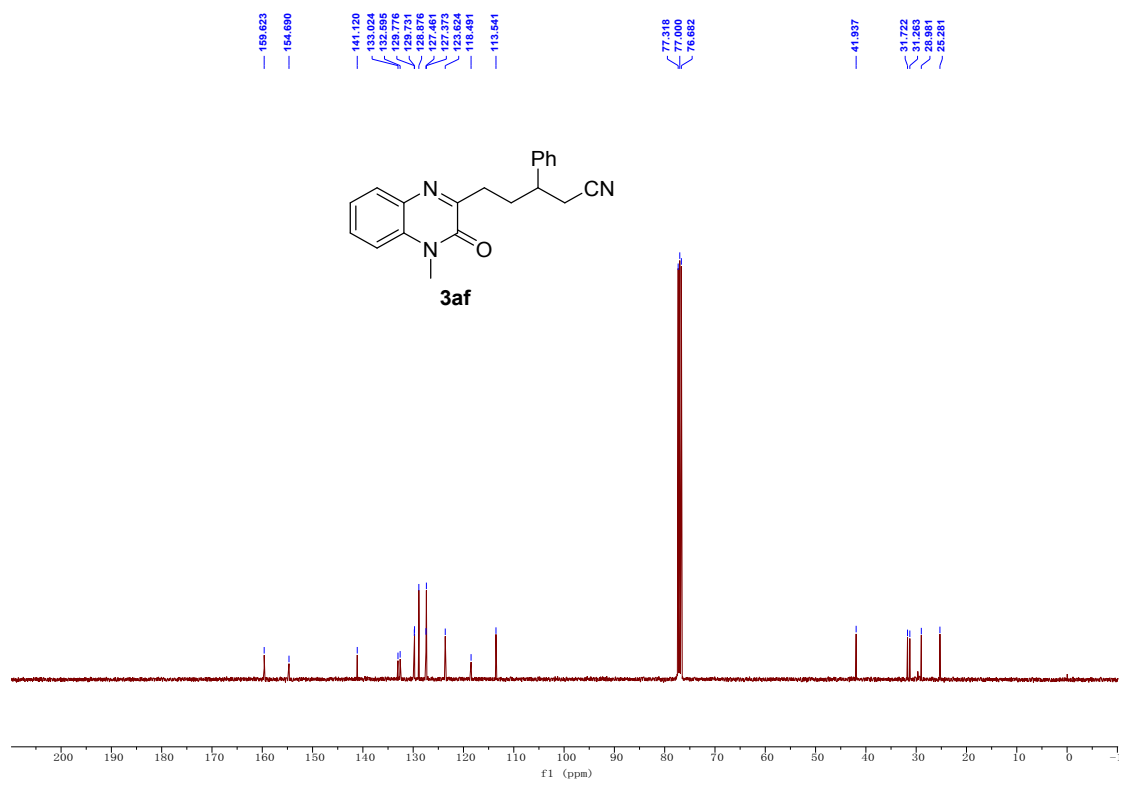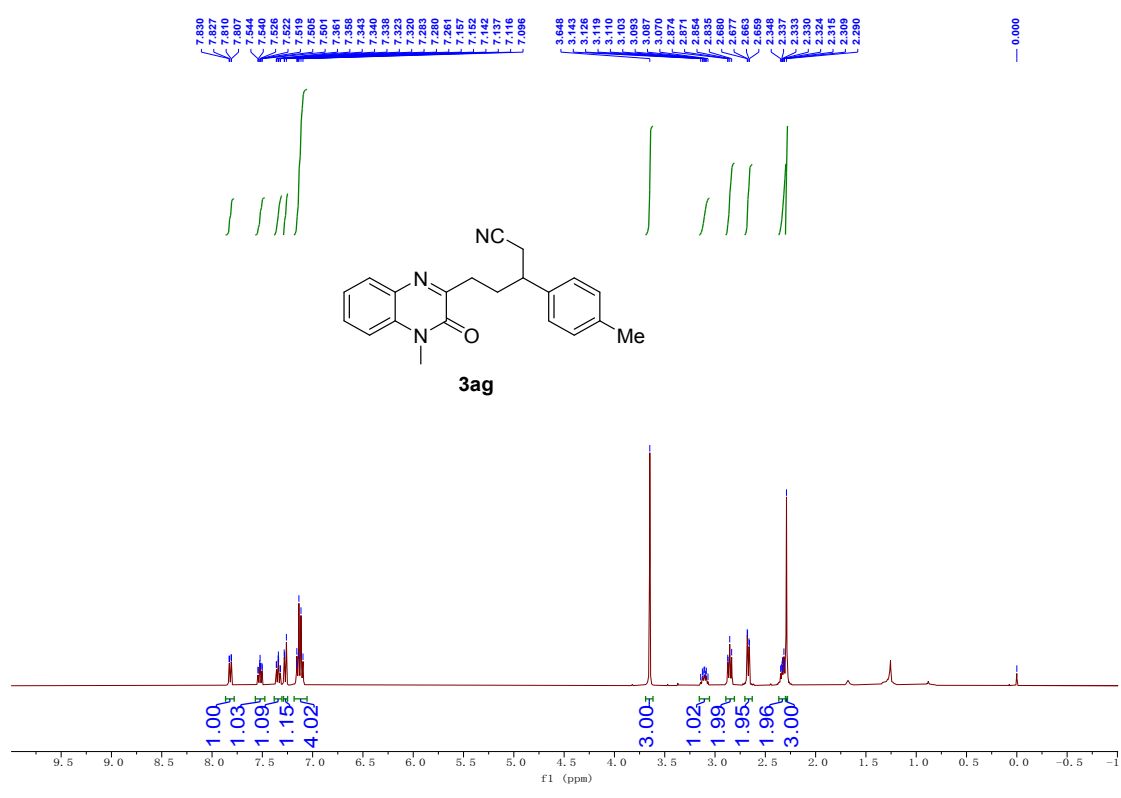



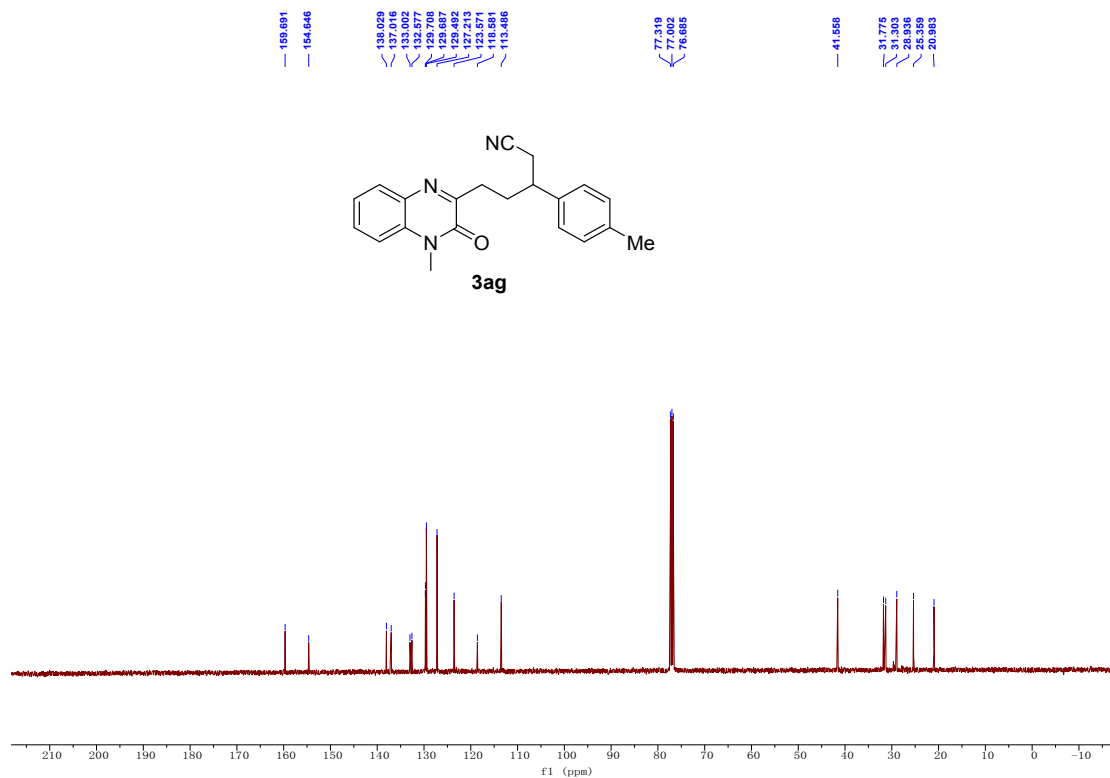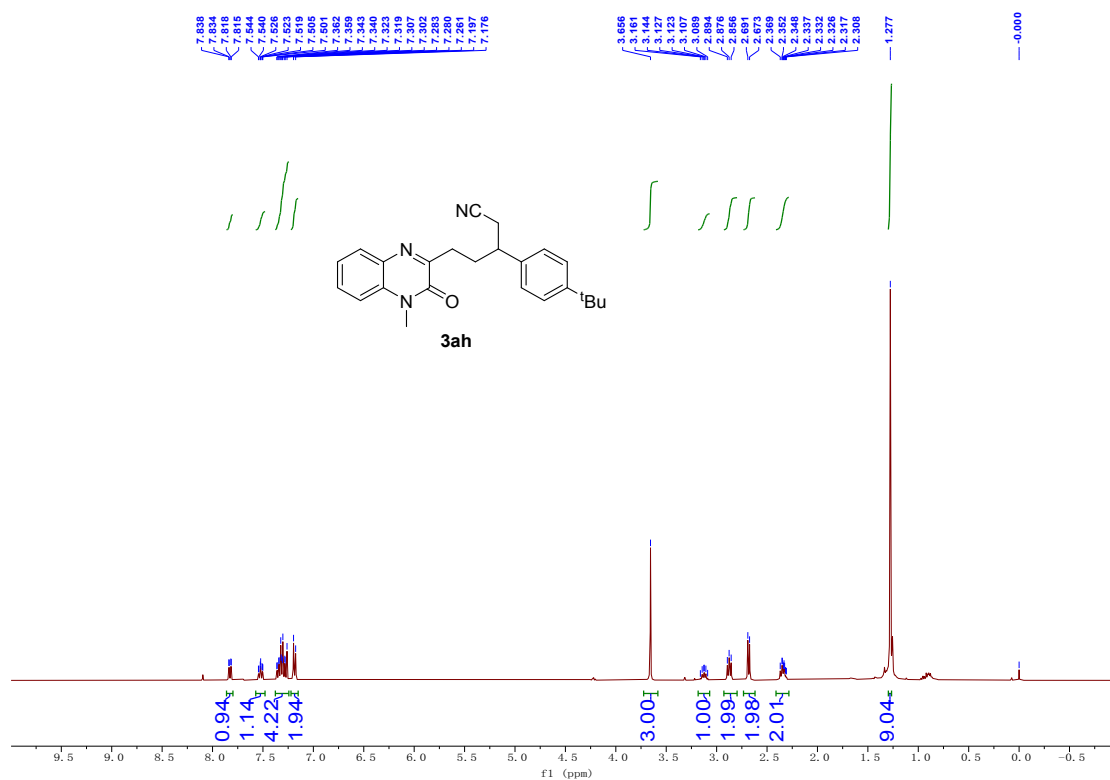

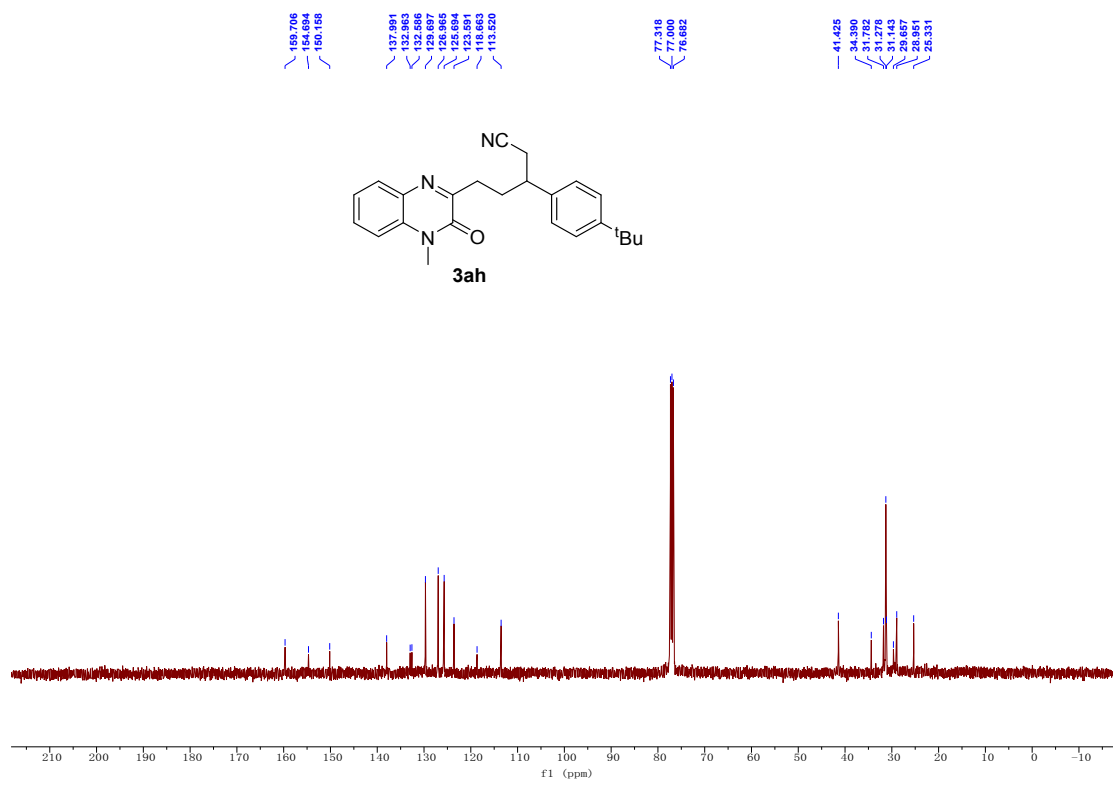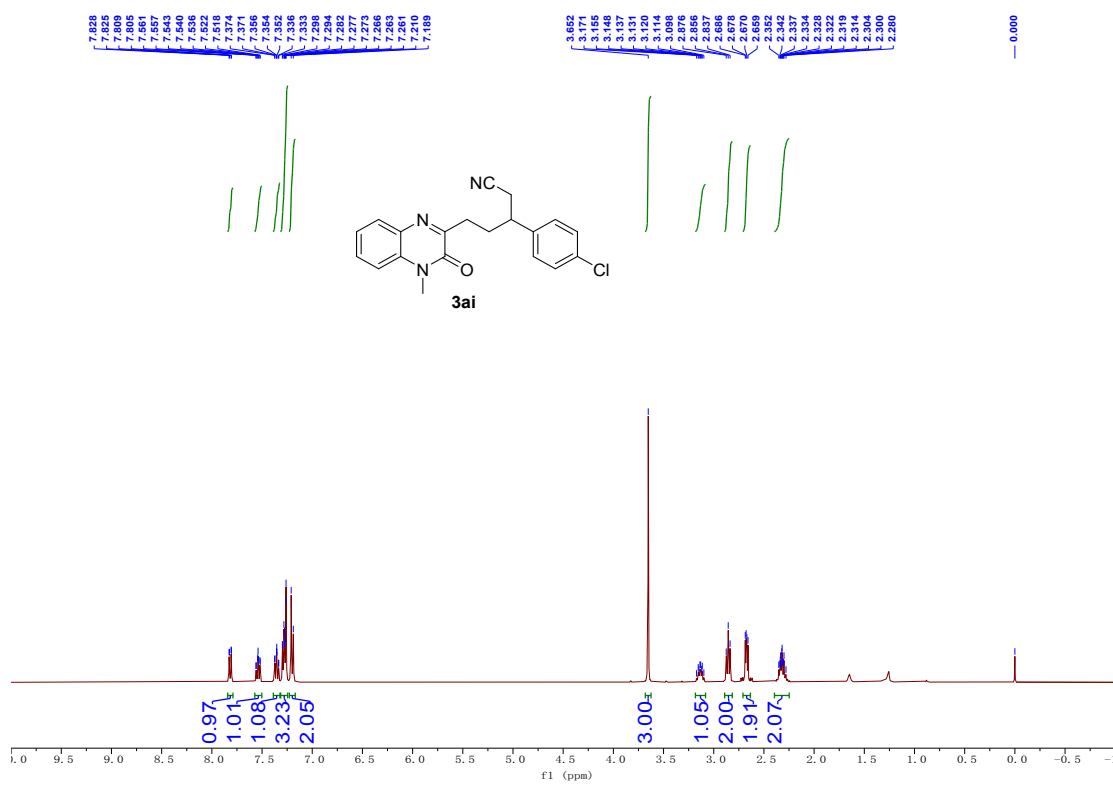

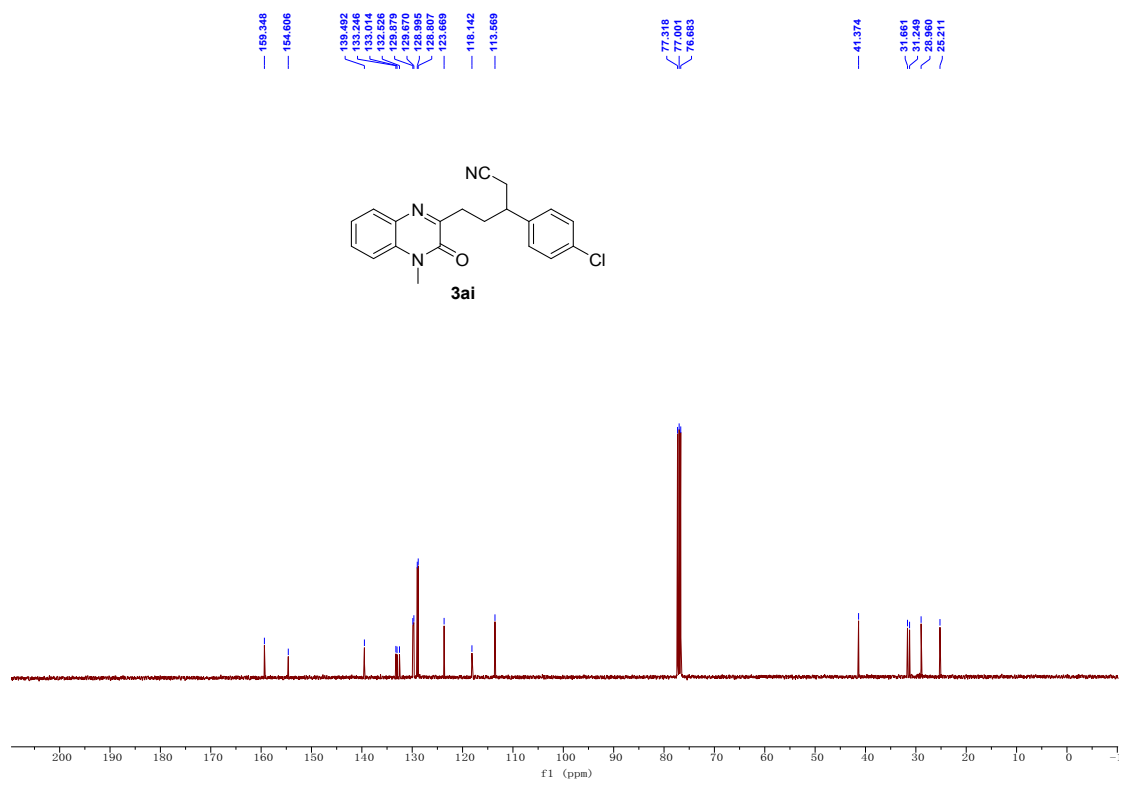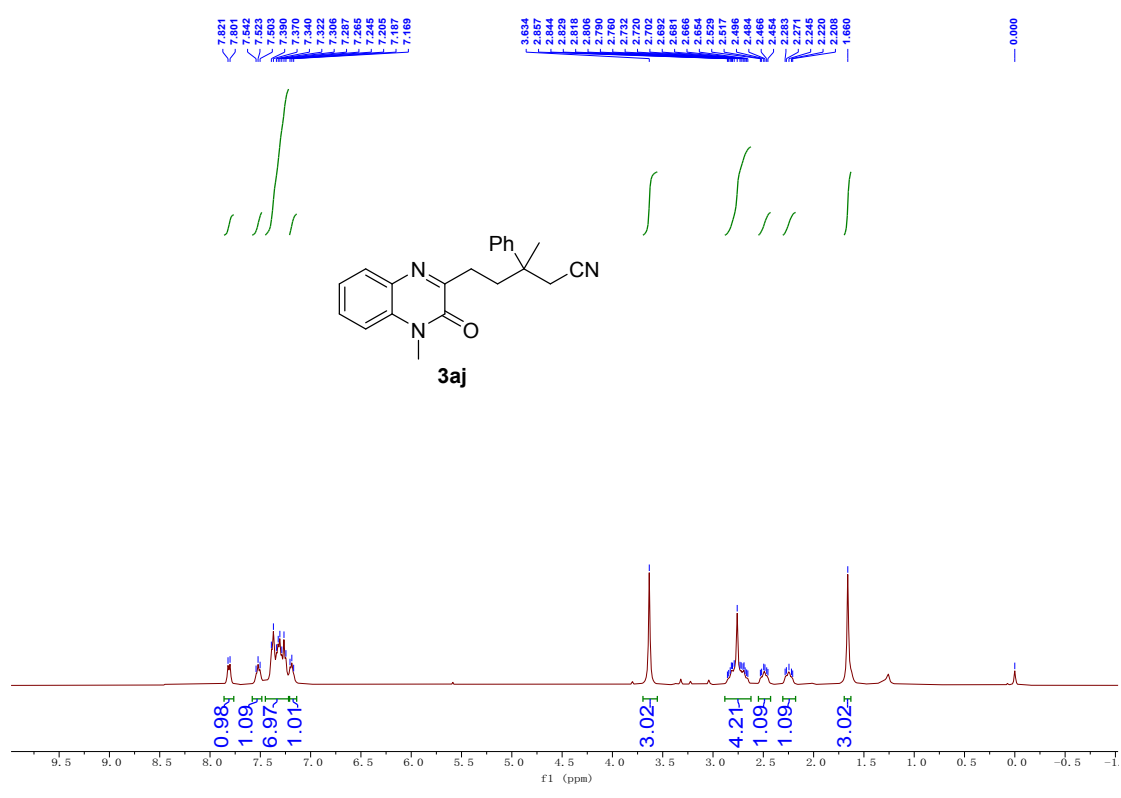

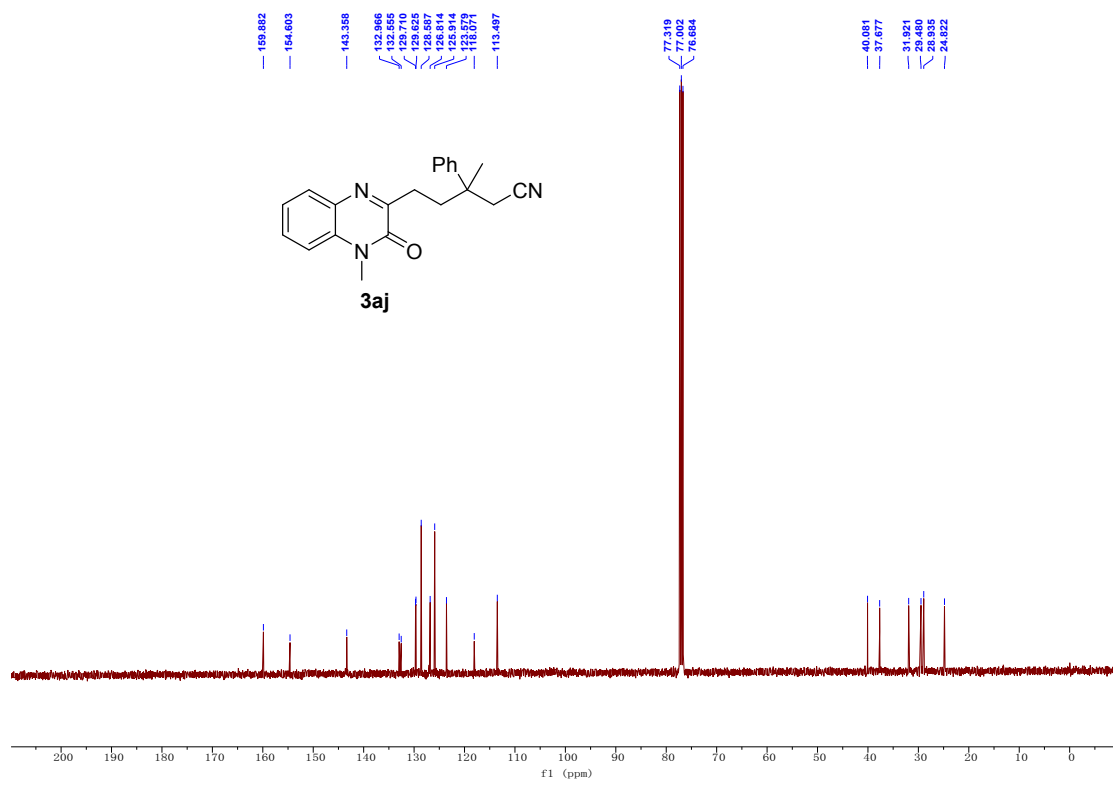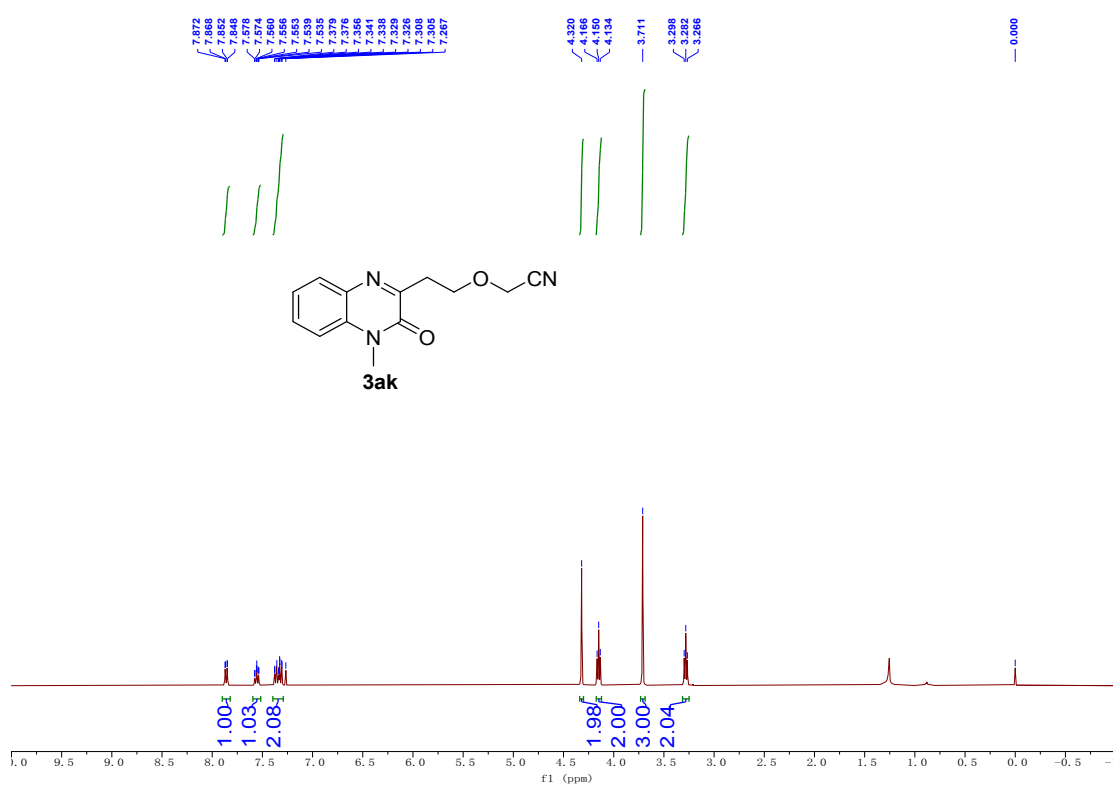

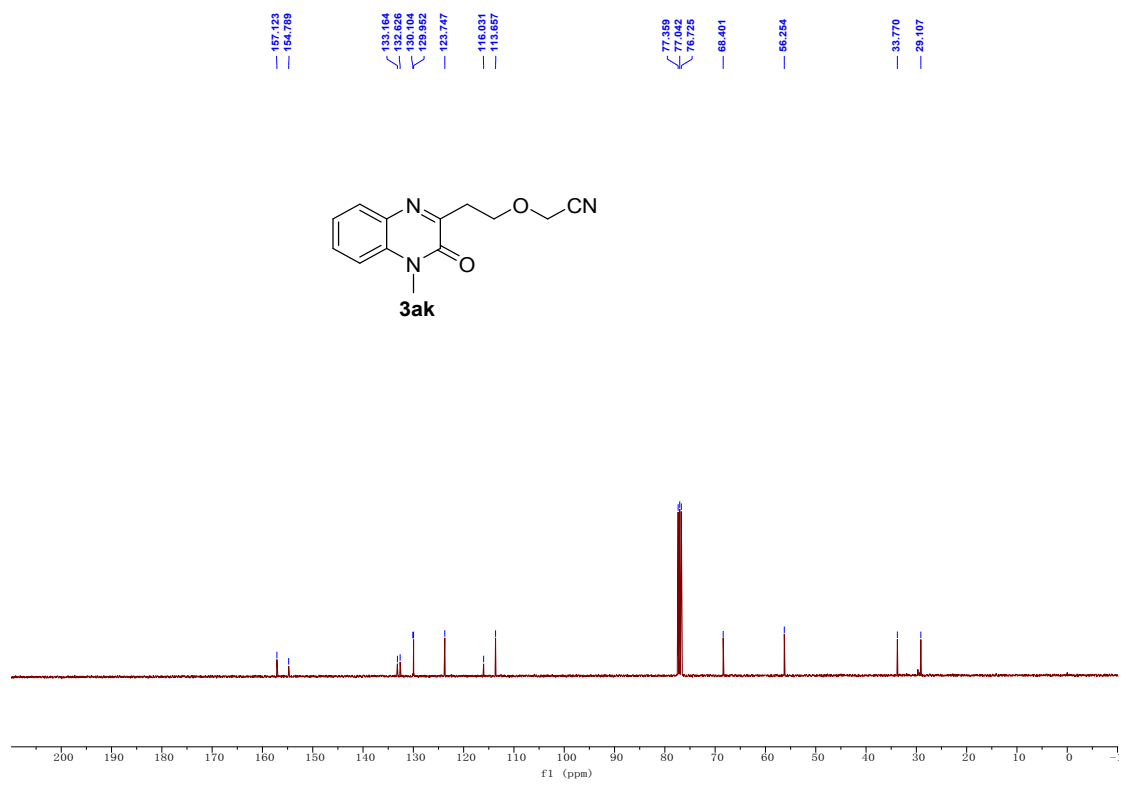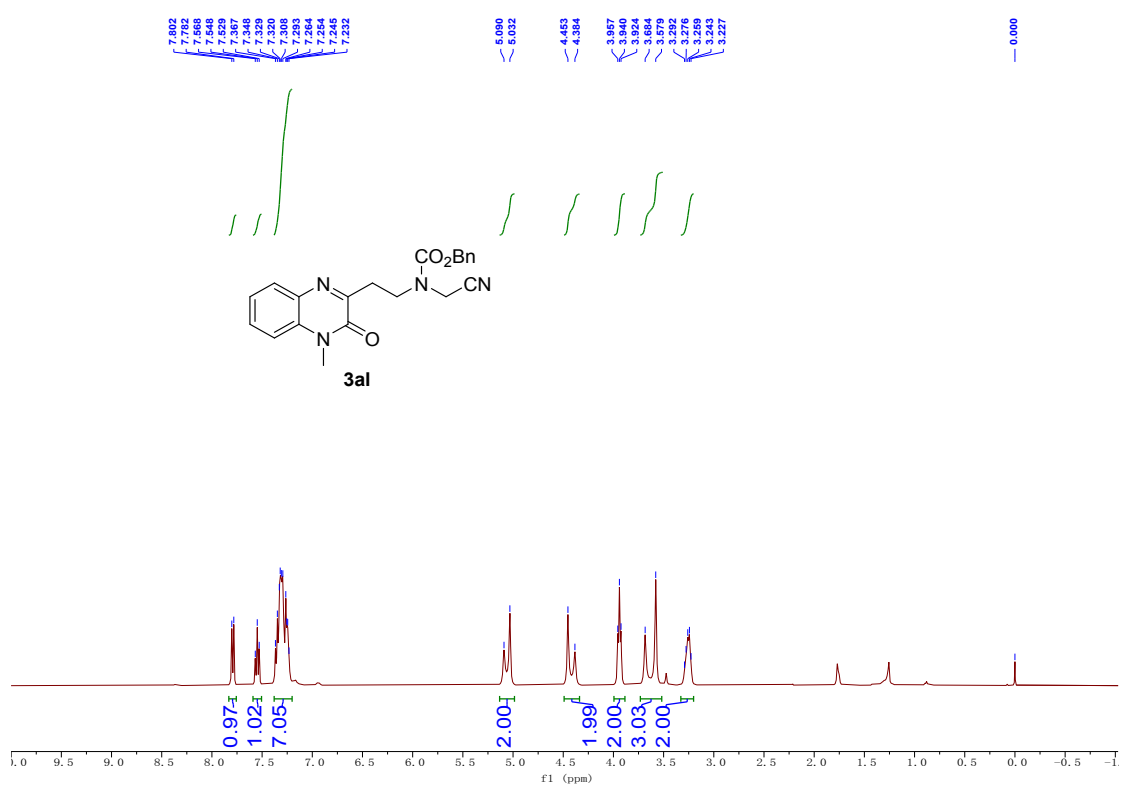

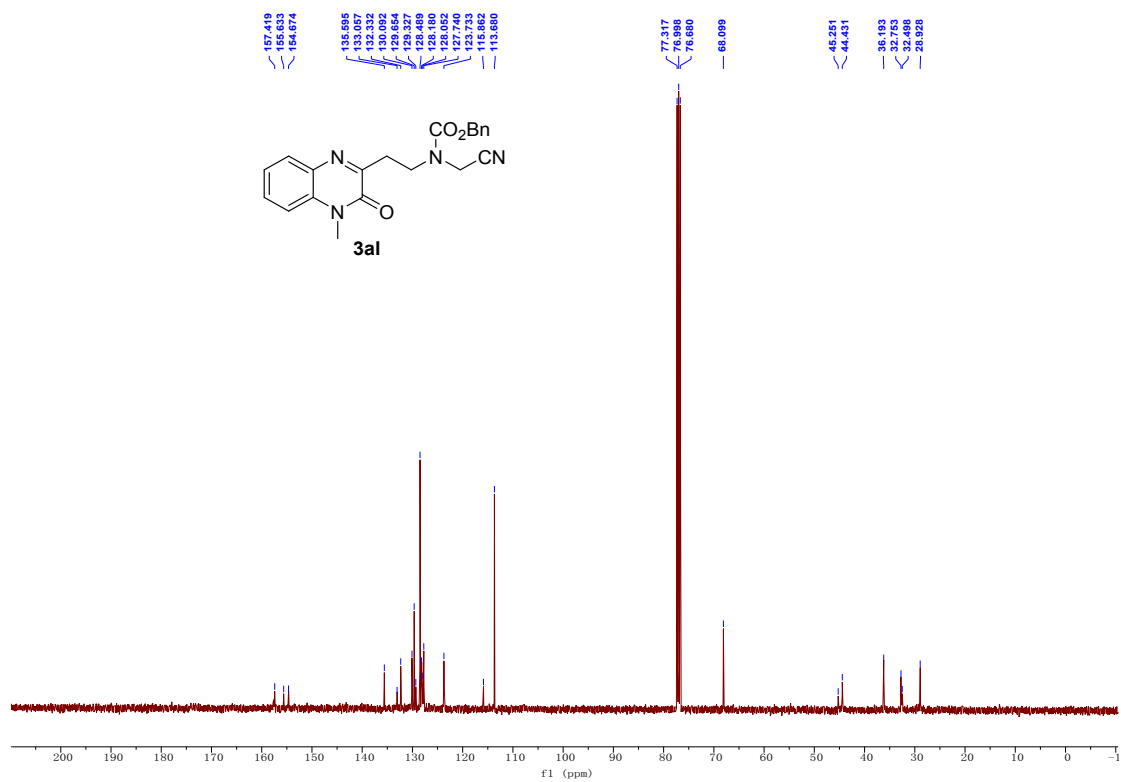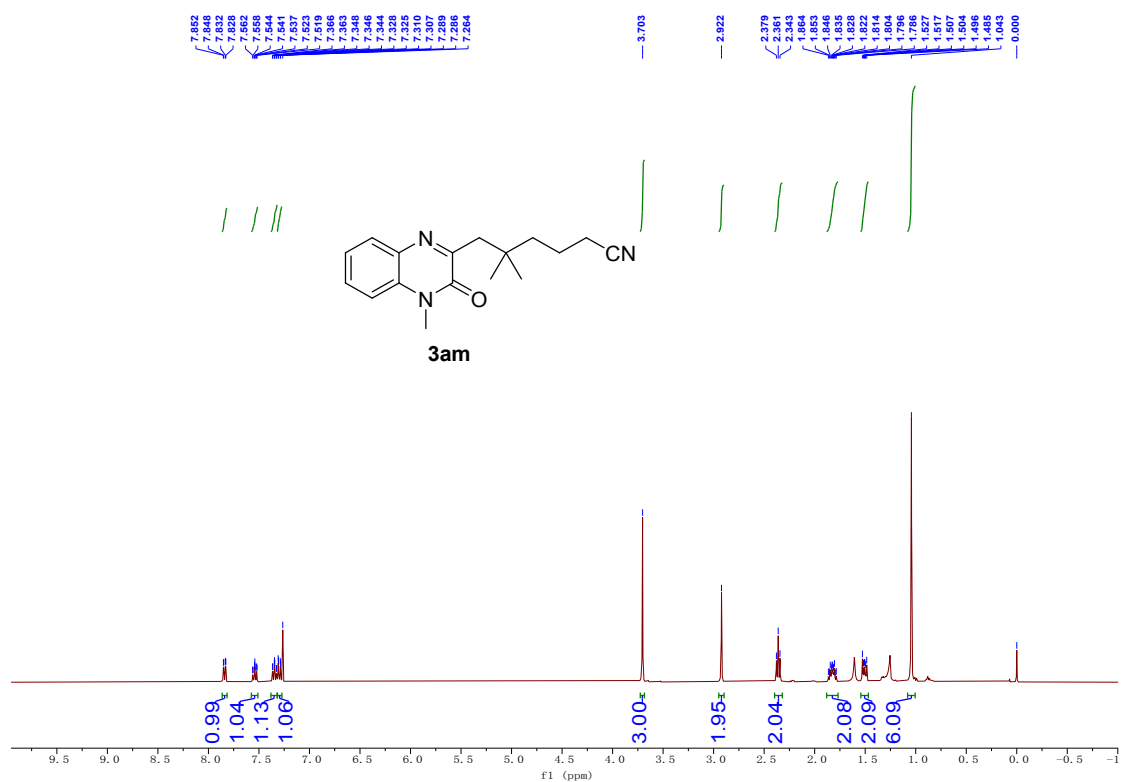

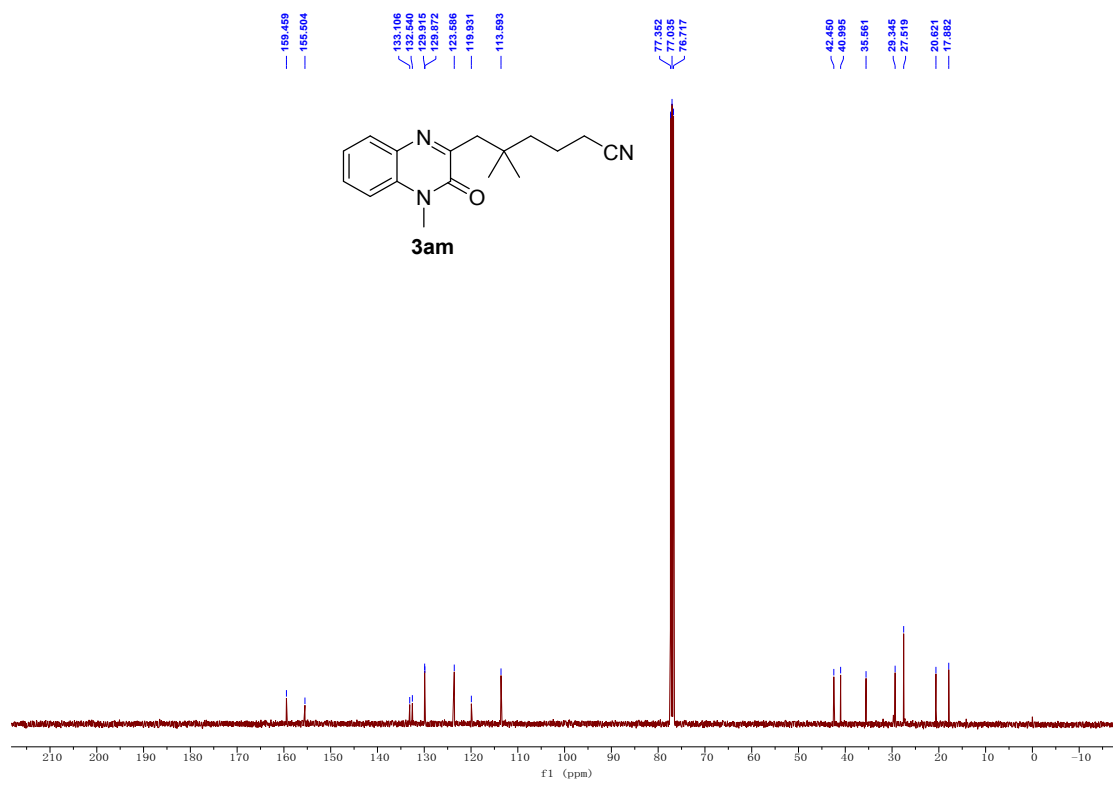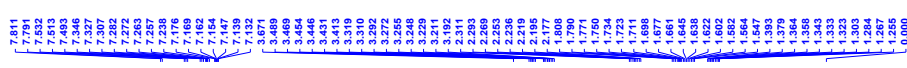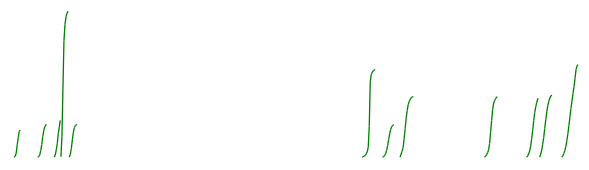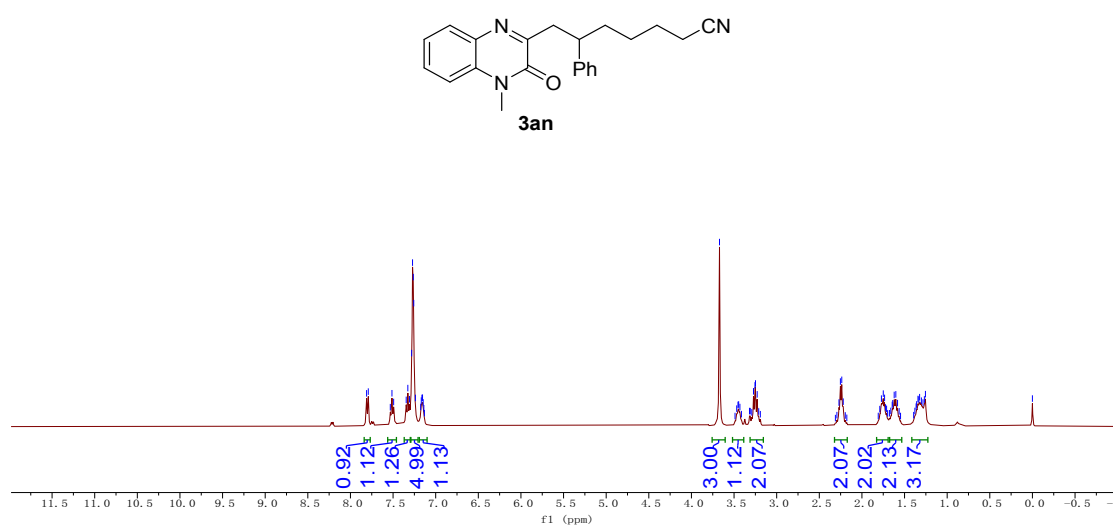

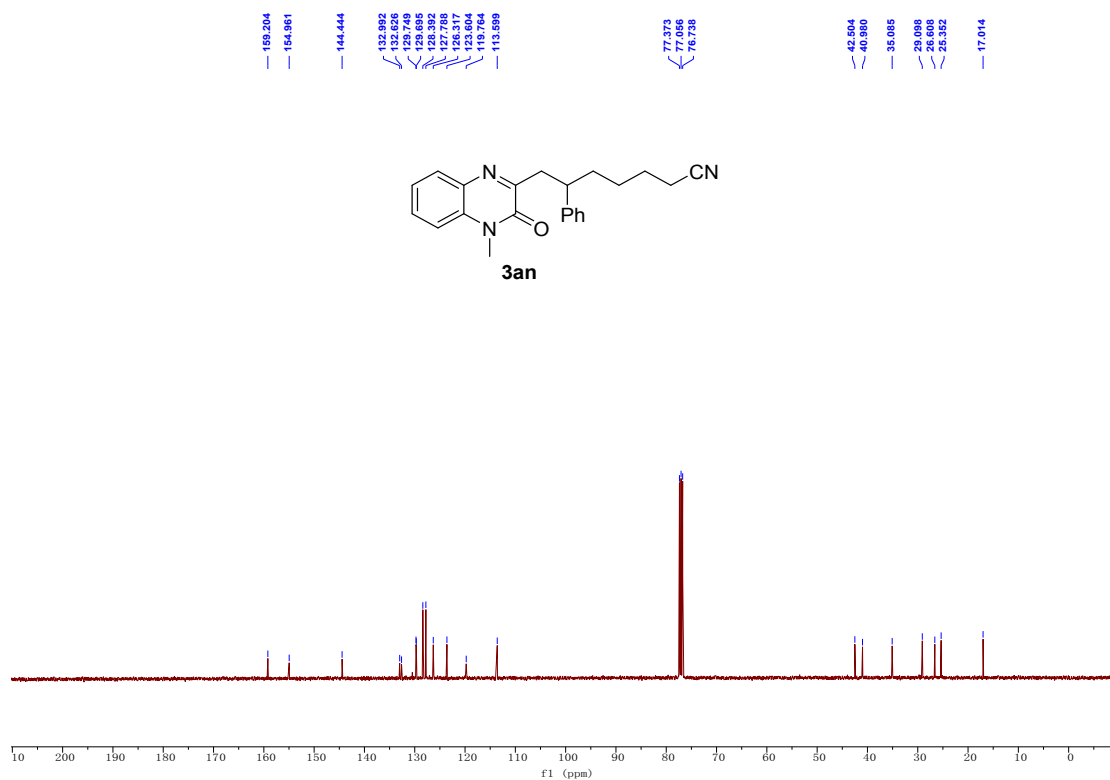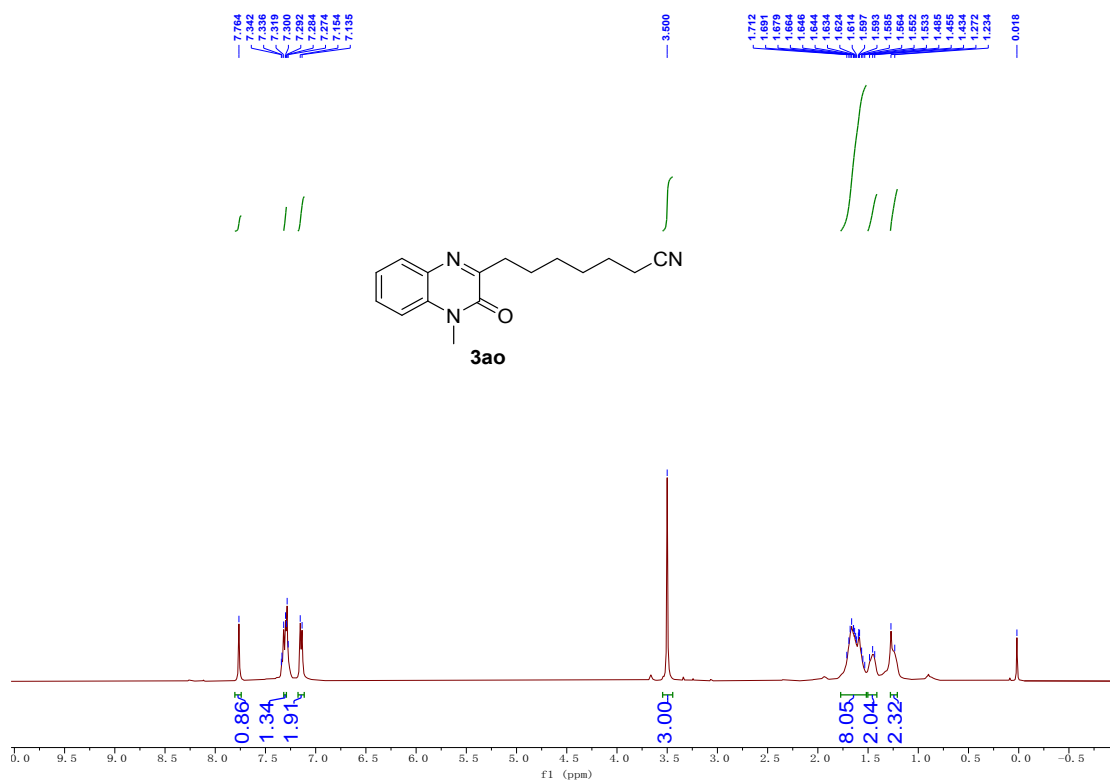



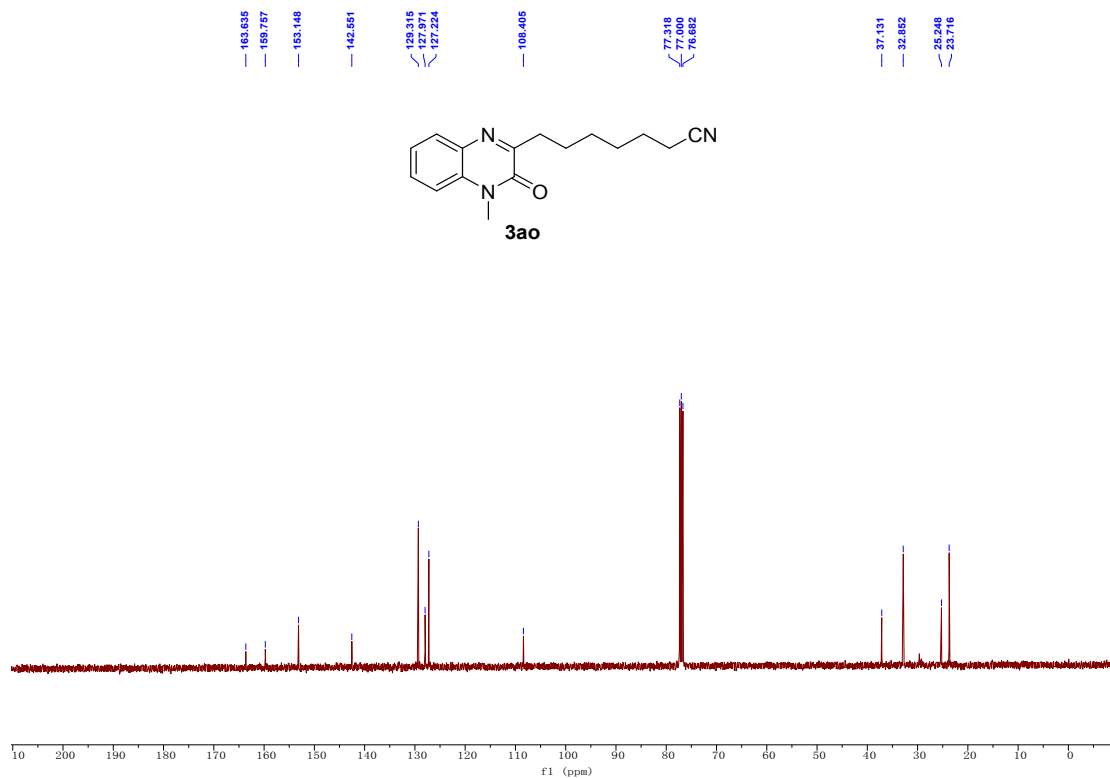

Supplement: d1ob00610j1.pdf [file d1ob00610j1.pdf]
